# Supplementary material for: A practicable synthesis of 2,3-disubstituted 1,4-dioxanes bearing a carbonyl functionality from α,β-unsaturated ketones using the Williamson strategy
Source: Royal Society of Chemistry journal article supplement (doi:10.1039/d0ob01448f), 2020-12-29
Supplement: d0ob01448f1.pdf [file d0ob01448f1.pdf]

## Supporting Information

### **A Practicable Synthesis of 2,3-Disubstituted 1,4-Dioxane Bearing Carbonyl Functionality from $\alpha,\beta$ -Unsaturated Ketones using Williamson Strategy**

**Aramita De,<sup>§</sup> Sougata Santra,<sup>†</sup> Igor A. Khalymbadzha,<sup>†</sup> Grigory V. Zyryanov<sup>†,‡</sup> and  
Adinath Majee<sup>\*,§</sup>**

<sup>§</sup> *Department of Chemistry, Visva-Bharati (A Central University), Santiniketan 731235, India*

*\*Email: [adinath.majee@visva-bharati.ac.in](mailto:adinath.majee@visva-bharati.ac.in)*

<sup>†</sup> *Department of Organic and Biomolecular Chemistry, Chemical Engineering Institute, Ural  
Federal University, 19 Mira Street, 620002 Yekaterinburg, Russian Federation*

<sup>‡</sup> *I. Ya. Postovskiy Institute of Organic Synthesis, Ural Division of the Russian Academy of  
Sciences, 22 Sofi Kovalevskoy Street, 620219 Yekaterinburg, Russian Federation*

## Table of Contents

|                                      | Page No: |
|--------------------------------------|----------|
| NMR spectra of synthesized compounds | 2-45     |

**$^1\text{H}$  and  $^{13}\text{C}$  NMR spectra of synthesized compounds:**

<sup>1</sup>H of VBAR-2ba

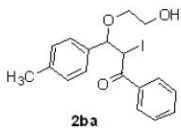

8.050  
8.046  
8.031  
8.028  
7.615  
7.597  
7.579  
7.505  
7.486  
7.467  
7.353  
7.333  
7.231  
7.211

5.419  
5.394  
5.099  
5.073

3.631  
3.623  
3.614  
3.610  
3.601  
3.527  
3.519  
3.513  
3.505  
3.482  
3.474  
3.435  
3.423  
3.415  
3.409  
3.401  
2.386

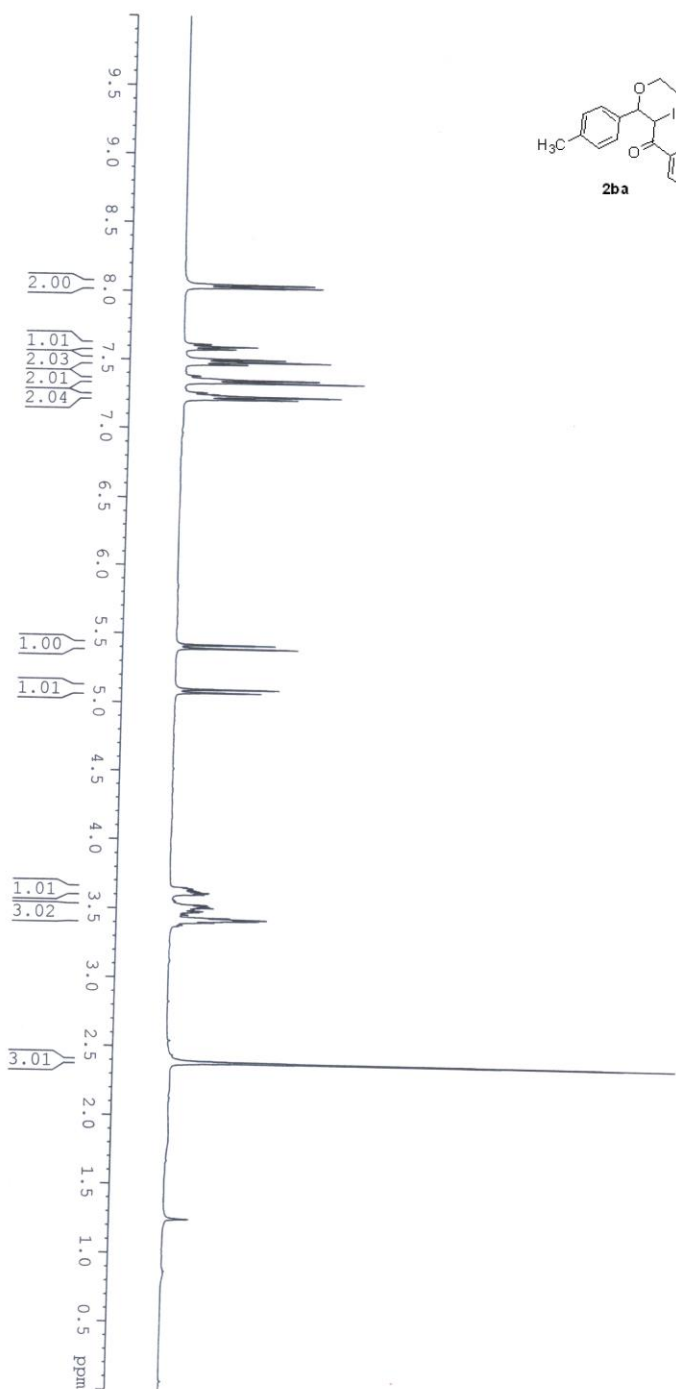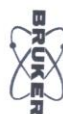

Current Data Parameters  
NAME Dr. A MAJEE 2020  
EXPNO 379  
PROCNO 1

F2 - Acquisition Parameters  
Date\_ 20200924  
Time 16.12  
INSTRUM spect  
PROBHD 5 mm PABBO BB/  
PULPROG zg30  
TD 32768  
SOLVENT CDCl3  
NS 16  
DS 1  
SWH 8223.685 Hz  
FIDRES 0.250967 Hz  
AQ 1.9922944 sec  
RG 67.81  
DW 60.800 usec  
DE 6.50 usec  
TE 297.3 K  
D1 1.0000000 sec  
TD0 1

===== CHANNEL f1 =====  
SFO1 400.1524711 MHz  
NUC1 1H  
P1 14.75 usec  
PLW1 12.00000000 W  
  
F2 - Processing parameters  
SI 16384  
SF 400.1500144 MHz  
WDW EM  
SSB 0  
LB 0.30 Hz  
GB 0  
PC 2.00

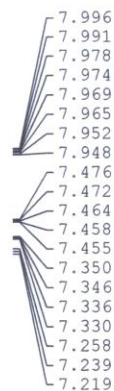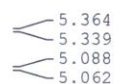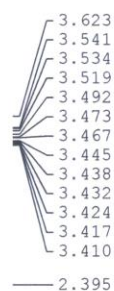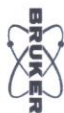

Current Data Parameters  
 NAME Dr. A MAJEE 2020  
 EXPNO 301  
 PROCNO 1

F2 - Acquisition Parameters  
 Date\_ 20200828  
 Time\_ 10.54  
 INSTRUM spect  
 PROBHD 5 mm PABBO BE/  
 PULPROG zg30  
 TD 32768  
 SOLVENT CDCl3  
 NS 16  
 DS 1  
 SWH 8223.685 Hz  
 FIDRES 0.250967 Hz  
 AQ 1.9922944 sec  
 RG 57.28  
 DW 60.800 usec  
 DE 6.50 usec  
 TE 294.2 K  
 D1 1.00000000 sec  
 TDO 1

===== CHANNEL f1 =====  
 SFO1 400.1524711 MHz  
 NUC1 1H  
 P1 14.75 usec  
 PLM1 12.00000000 W

F2 - Processing Parameters  
 SI 16384  
 SF 400.1500097 MHz  
 WDW EM  
 SSB 0  
 LB 0.30 Hz  
 GB 0  
 PC 2.00

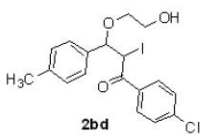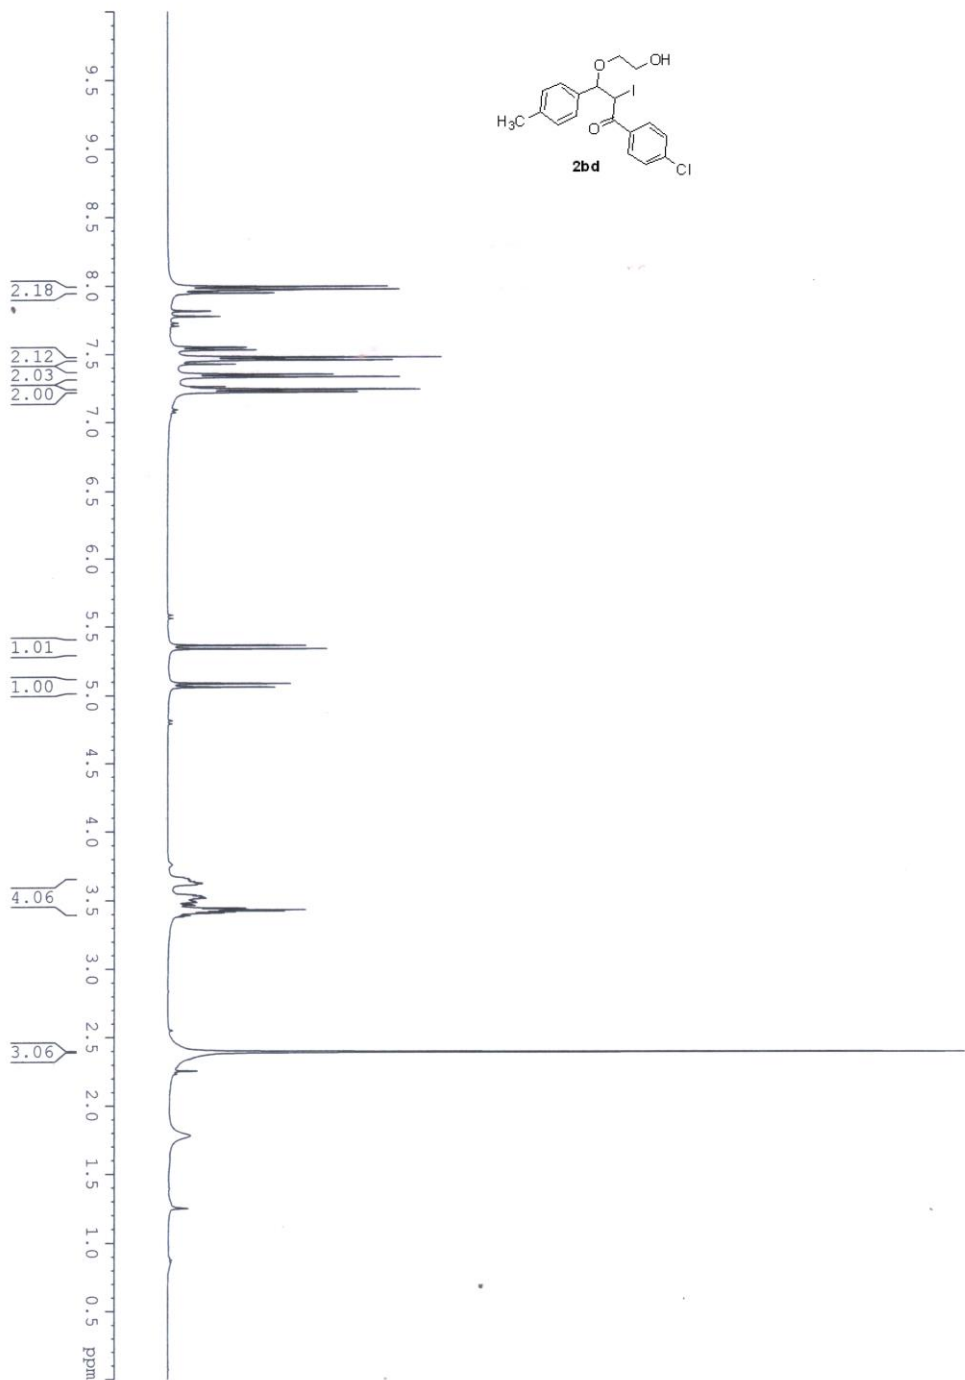

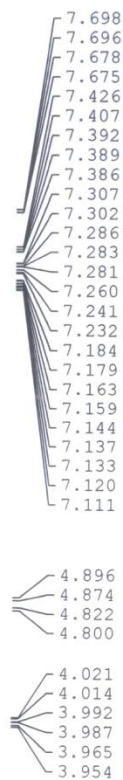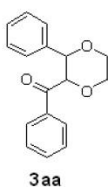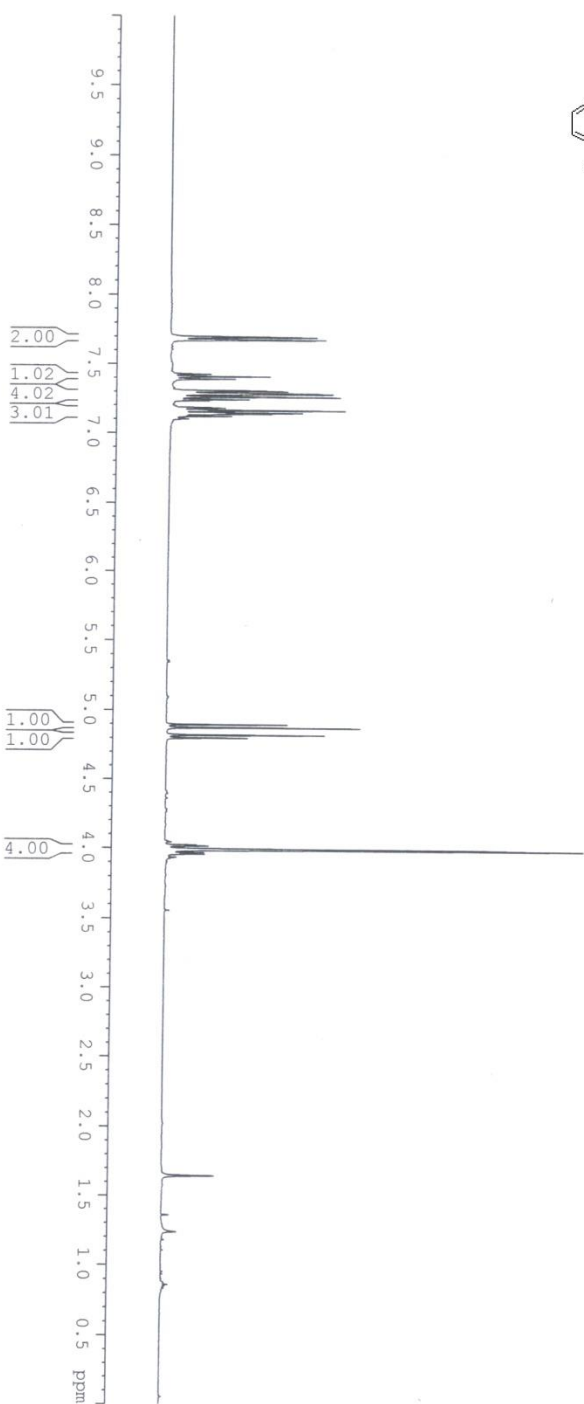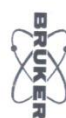

Current Data Parameters  
NAME Dr. A. MAJE 2018  
EXPNO 632  
PROCNO 1

F2 - Acquisition Parameters  
Date\_ 20180802  
Time 12.23  
INSTRUM spect  
PROBHD 5 mm PABBO BB/  
PULPROG zg30  
TD 32768  
SOLVENT CDCl3  
NS 32  
DS 1  
SWH 8223.685 Hz  
FIDRES 0.250967 Hz  
AQ 1.9922944 sec  
RG 54.07  
DW 60.800 usec  
DE 6.50 usec  
TE 299.3 K  
D1 1.00000000 sec  
TD0 1

===== CHANNEL f1 =====  
SFO1 400.1524711 MHz  
NUC1 1H  
P1 14.75 usec  
PL1 12.00000000 W  
PLM1  
F2 - Processing parameters  
SI 16384  
SF 400.1500207 MHz  
WDW EM  
SSB 0  
LB 0.30 Hz  
GB 0  
PC 1.00

13C of VBAR-263/1

195.43

137.07  
135.86  
133.39  
128.79  
128.57  
128.40  
127.61

81.09  
79.95  
77.47  
77.15  
76.83  
66.75  
66.68

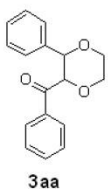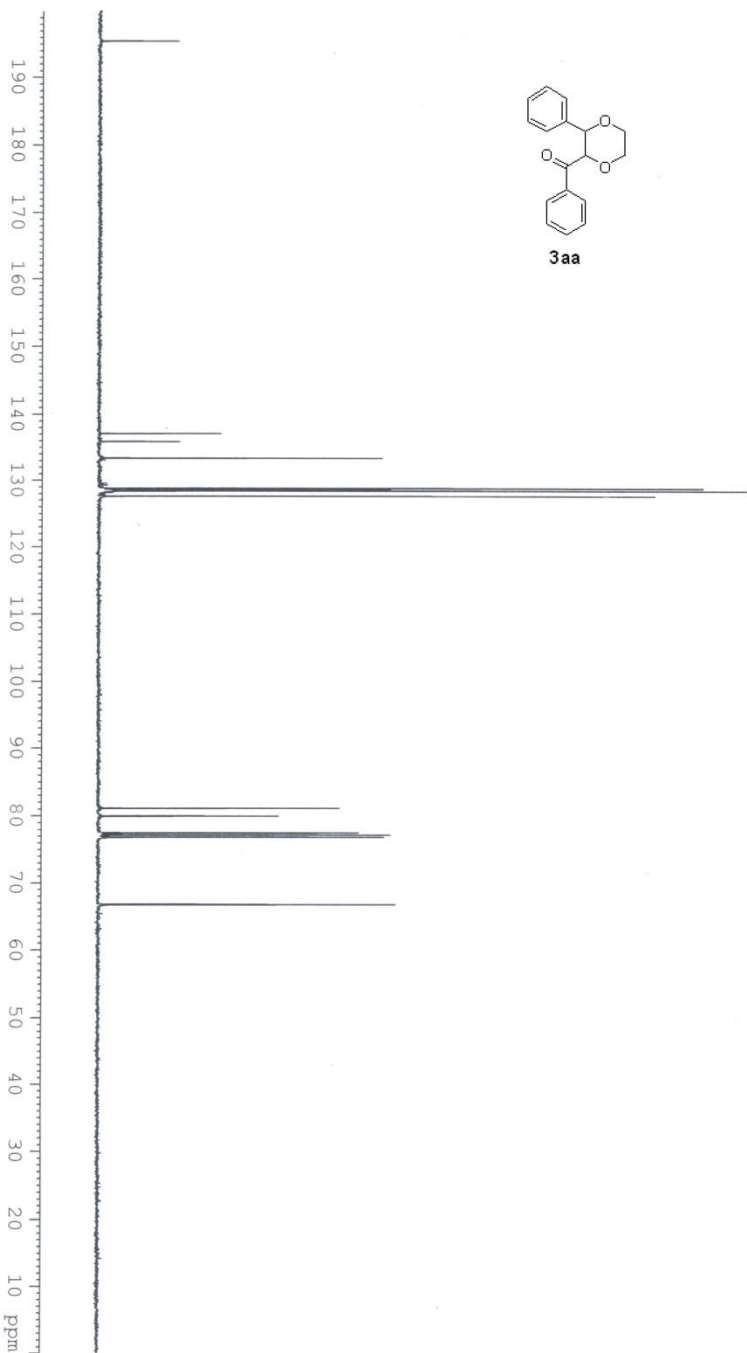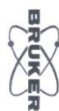

Current Data Parameters  
NAME Dr. A MAJE 2018  
EXPNO 633  
PROCNO 1

F2 - Acquisition Parameters  
Date\_ 20180802  
Time 12.57  
INSTRUM spect  
PROBHD 5 mm PABBO BH/  
PULPROG zgpg30  
TD 32768  
SOLVENT CDCl3  
NS 640  
DS 2  
SWH 24038.461 Hz  
FIDRES 0.733596 Hz  
AQ 0.6815744 sec  
RG 87.66  
DW 20.800 usec  
DE 6.50 usec  
TE 300.2 K  
D1 2.00000000 sec  
D11 0.03000000 sec  
TD0 1

CHANNEL f1  
SFO1 100.6278588 MHz  
NUC1 13C  
PI 8.90 usec  
PLW1 54.00000000 W

CHANNEL f2  
SFO2 400.1516006 MHz  
NUC2 1H  
CPDPRG12 waltz16  
PCPDZ 90.00 usec  
PLW2 12.00000000 W  
PLW12 0.32231000 W  
PLW13 0.16212000 W

F2 - Processing parameters  
SI 16384  
SF 100.6177902 MHz  
WDW EM  
SSB 0  
LB 1.00 Hz  
GB 0  
PC 2.00

1H OF VBAR-271

7.744  
7.742  
7.723  
7.720  
7.472  
7.453  
7.438  
7.434  
7.324  
7.304  
7.285  
7.260  
7.208  
7.188  
7.006  
6.986

4.894  
4.872  
4.818  
4.795

4.042  
4.012  
4.007  
3.986  
3.976

2.218

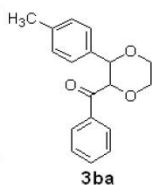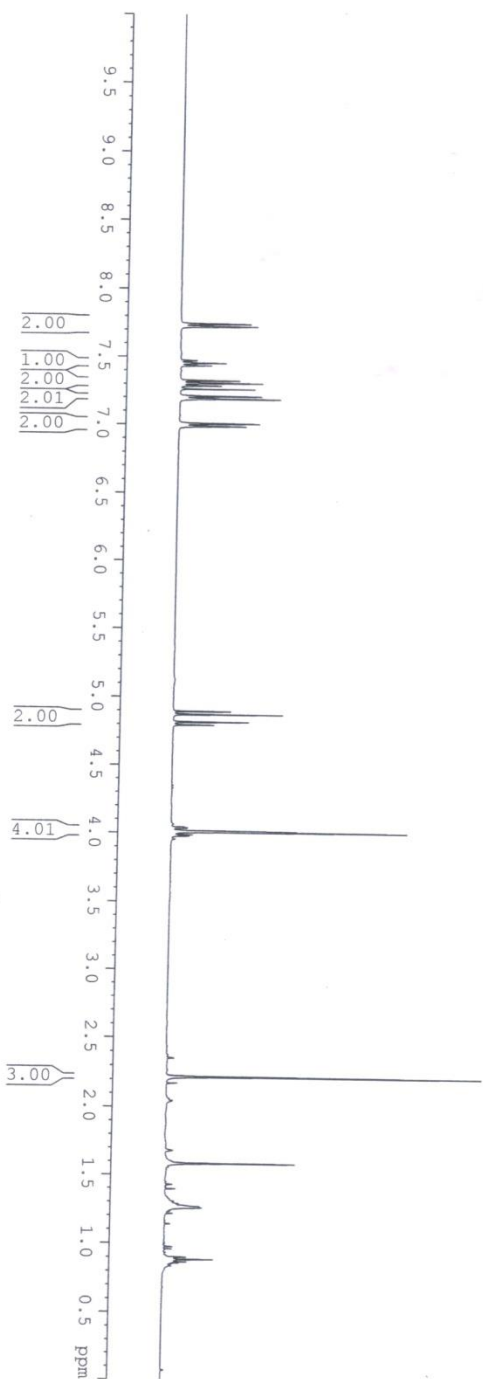

Current Data Parameters  
NAME Dr. A. MAJEE 2017  
EXNO 948  
PROCNO 1

F2 - Acquisition Parameters  
Date 20171214  
Time 10.33  
INSTRUM spect  
PROBHD 5 mm PABBO BB/  
PULPROG zg30  
TD 32768  
SOLVENT CDCl3  
NS 32  
DS 1  
SWH 8223.685 Hz  
FIDRES 0.250967 Hz  
AQ 1.9922944 sec  
RG 120.16  
DW 60.800 usec  
DE 6.50 usec  
TE 296.0 K  
D1 1.00000000 sec  
TD0 1

===== CHANNEL f1 =====  
SFO1 400.1524711 MHz  
NUC1 1H  
P1 14.75 usec  
PLM1 12.00000000 W

F2 - Processing Parameters  
SI 16384  
SF 400.1500095 MHz  
WDW EM  
SSB 0  
LB 0.30 Hz  
GB 0  
PC 1.00

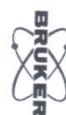

<sup>13</sup>C OF VBAR- 271

— 195.53

138.34  
135.86  
134.11  
133.37  
129.12  
128.92  
128.42  
127.54

81.16  
79.76  
77.47  
77.15  
76.83  
66.81  
66.74

— 21.23

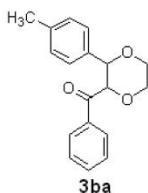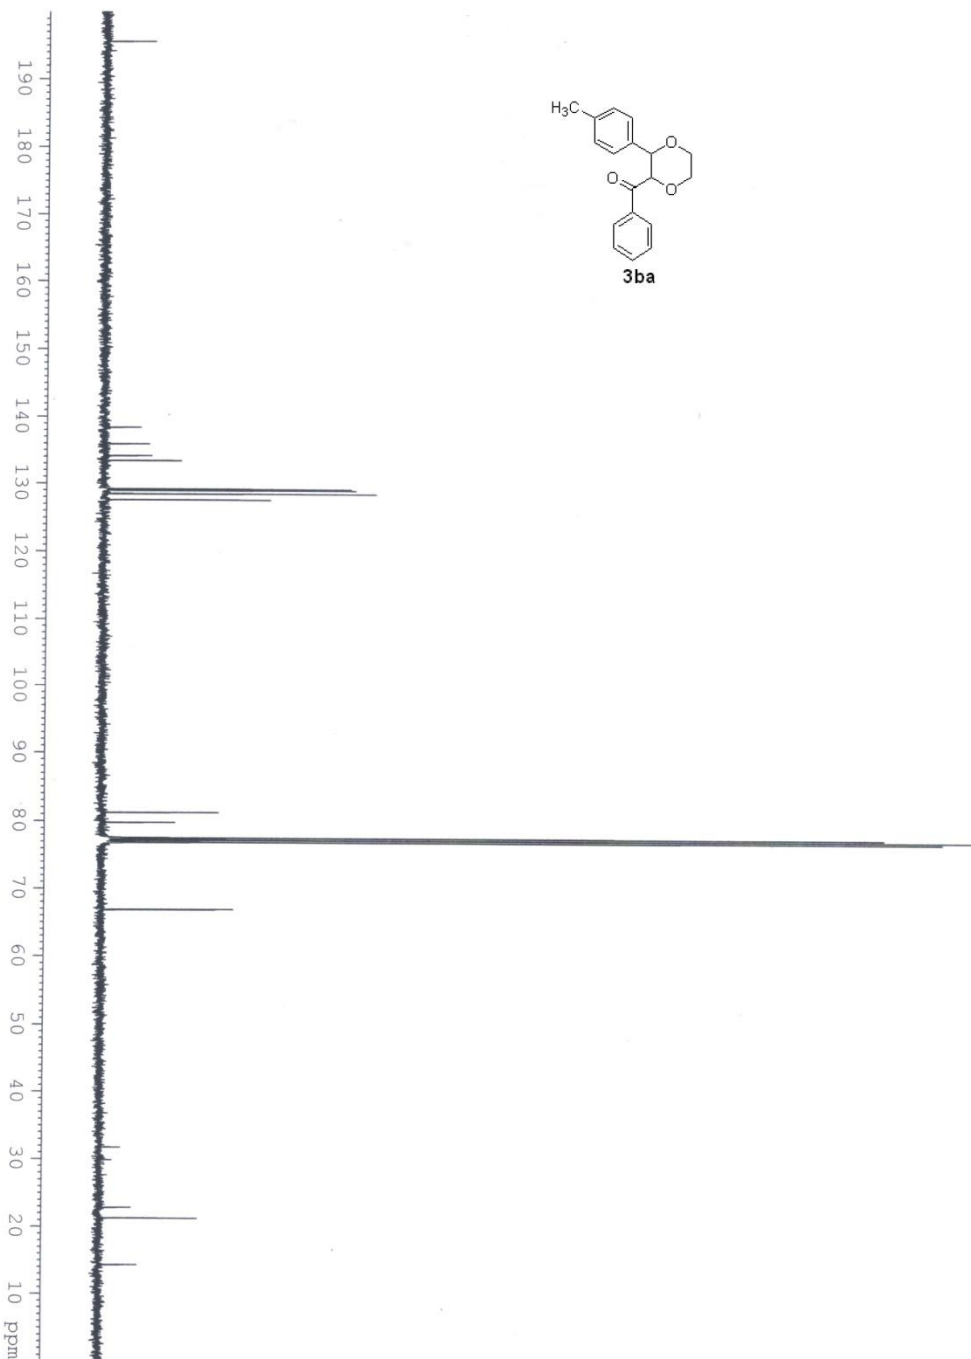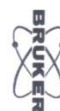

Current Data Parameters  
NAME Dr. A MAJEE 2017  
EXPNO 950  
PROCNO 1

F2 - Acquisition Parameters  
Date\_ 20171214  
Time\_ 12.14  
INSTRUM spect  
PROBHD 5 mm PABBO BB/  
PULPROG zgpg30  
TD 32768  
SOLVENT CDCl3  
NS 512  
DS 2  
SWH 24038.461 Hz  
FIDRES 0.733596 Hz  
AQ 0.6815744 sec  
RG 186.42  
DW 20.800 usec  
DE 6.50 usec  
TE 295.1 K  
D1 2.00000000 sec  
D11 0.03000000 sec  
TD0 1

CHANNEL F1  
SF01 100.627858 MHz  
NUC1 13C  
P1 8.90 usec  
PLW1 54.00000000 W

CHANNEL F2  
SF02 400.151606 MHz  
NUC2 1H  
CPRPG12 waltz16  
PCPD2 90.00 usec  
PLM2 12.00000000 W  
PLM12 0.32231000 W  
PLM13 0.16212000 W

F2 - Processing parameters  
SI 16384  
SF 100.617858 MHz  
WDW EM  
SSB 0  
LB 1.00 Hz  
GB 0  
PC 1.40



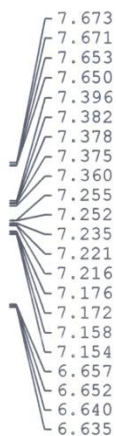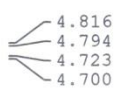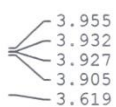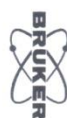

Current Data Parameters  
NAME Dr. A MAJEE 2018  
EXPNO 67  
PROCNO 1

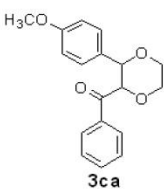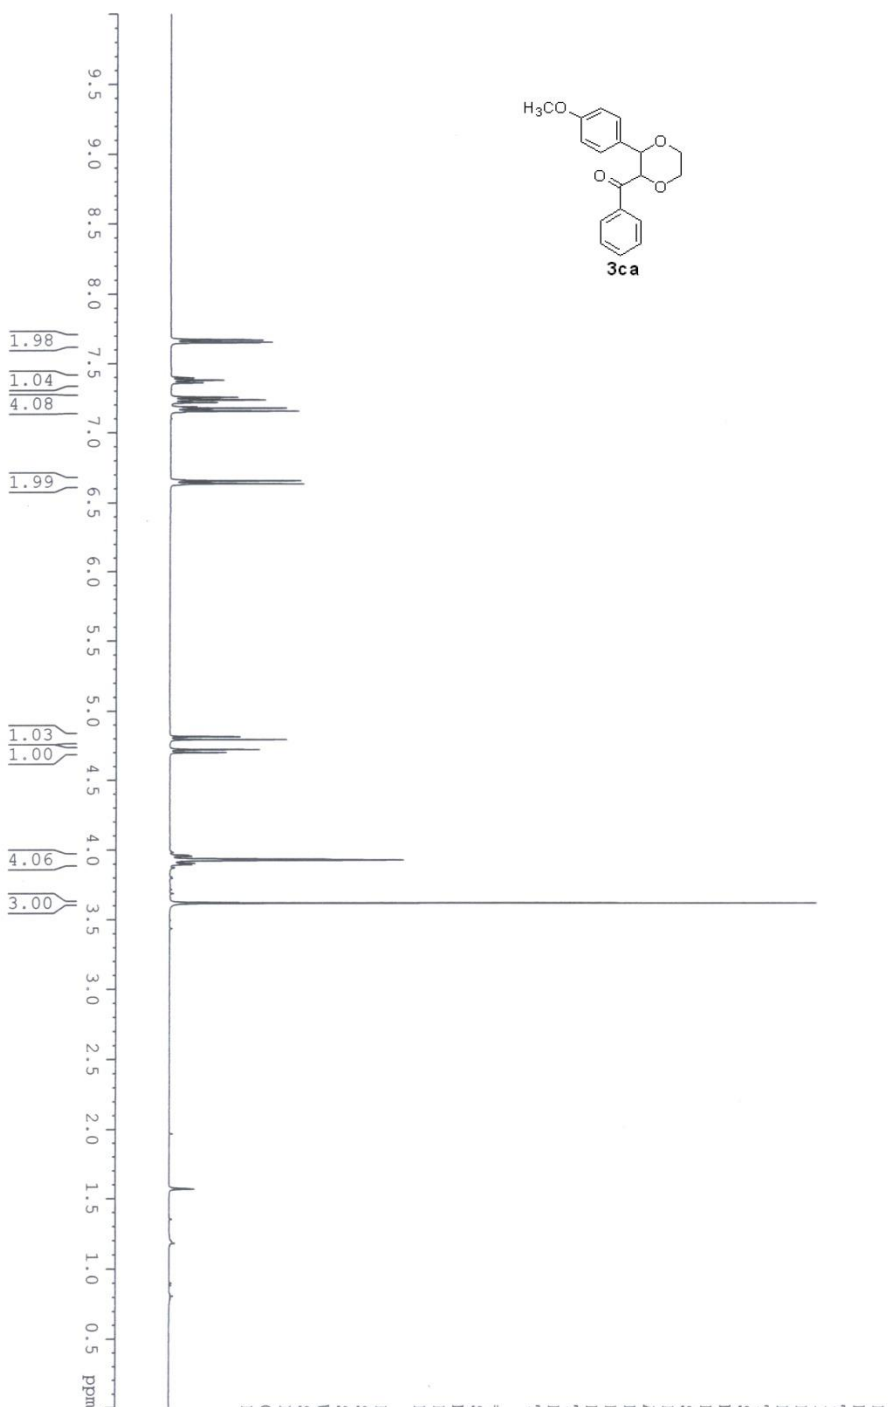

F2 - Acquisition Parameters  
Date\_ 20180131  
Time 17.28  
INSTRUM spect  
PROBHD 5 mm PABBO BB/  
PULPROG zg30  
TD 32768  
SOLVENT CDCl3  
NS 16  
DS 1  
SWH 8223.685 Hz  
FIDRES 0.250967 Hz  
AQ 1.9922944 sec  
RG 62.69  
DW 60.800 usec  
DE 6.50 usec  
TE 294.6 K  
D1 1.0000000 sec  
TD0 1

===== CHANNEL f1 =====  
SFO1 400.1524711 MHz  
NUC1 1H  
P1 14.75 usec  
PLW1 12.00000000 W

F2 - Processing parameters  
SI 16384  
SF 400.1500388 MHz  
WDW EM  
SSB 0  
LB 0.30 Hz  
GB 0  
PC 1.00

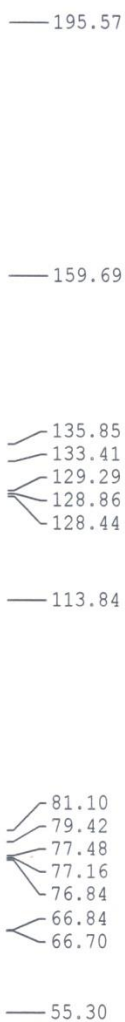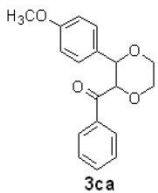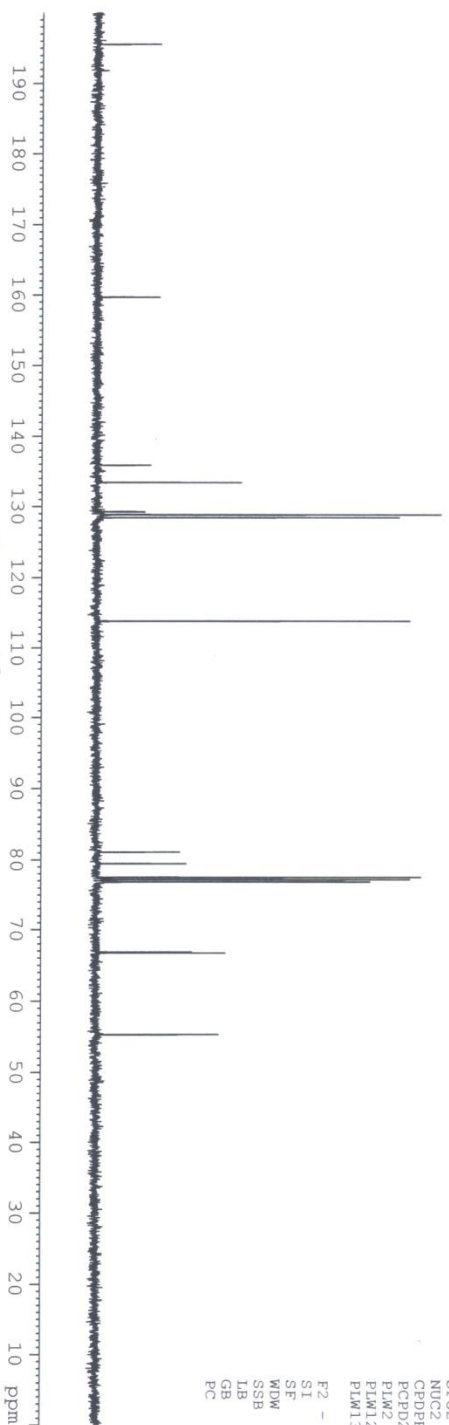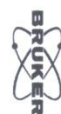

Current Data Parameters  
NAME Dr. A. MAJEE 2018  
EXPNO 70  
PROCNO 1

F2 - Acquisition Parameters  
Date\_ 20180131  
Time 17.52  
INSTRUM spect  
PROBHD 5 mm PABBO BB/  
PULPROG zgpg30  
TD 32768  
SOLVENT CDCl3  
NS 260  
DS 2  
SWH 24038.461 Hz  
FIDRES 0.733596 Hz  
AQ 0.6815744 sec  
RG 186.42  
DW 20.800 usec  
DE 6.50 usec  
TE 295.1 K  
D1 2.00000000 sec  
D11 0.03000000 sec  
TD0 1

CHANNEL f1  
SFO1 100.6278588 MHz  
NUC1 13C  
P1 8.90 usec  
PLW1 54.00000000 W

CHANNEL f2  
SFO2 400.1516006 MHz  
NUC2 1H  
CPDPRG12 waltz16  
PCPD2 90.00 usec  
PLW2 12.00000000 W  
PLW12 0.32231000 W  
PLW13 0.16212000 W

F2 - Processing Parameters  
SI 16384  
SF 100.6177884 MHz  
WDW EM  
SSB 0  
LB 1.00 Hz  
GB 0  
PC 1.40

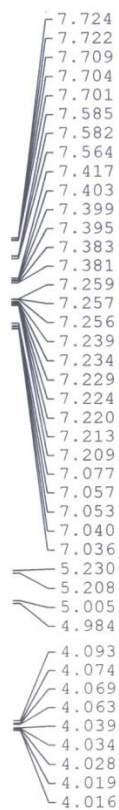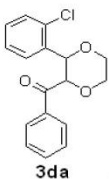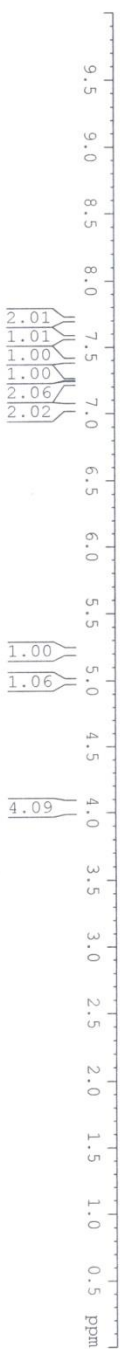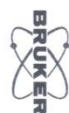

Current Data Parameters  
NAME Dr. A MAJE 2018  
EXPNO 591  
PROCNO 1

F2 - Acquisition Parameters  
Date\_ 20180724  
Time 9.49  
INSTRUM spect  
PROBHD 5 mm PABBO BB/  
PULPROG zg30  
TD 32768  
SOLVENT CDCl3  
NS 32  
DS 1  
SWH 8223.685 Hz  
FIDRES 0.250967 Hz  
AQ 1.9922944 sec  
RG 93.46  
DW 60.800 usec  
DE 6.50 usec  
TE 298.8 K  
D1 1.00000000 sec  
TD0 1

===== CHANNEL f1 =====  
SFO1 400.1524711 MHz  
NUC1 1H  
P1 14.75 usec  
PLM1 12.00000000 W

F2 - Processing parameters  
SI 16384  
SF 400.1500113 MHz  
WDW EM  
SSB 0  
LB 0.30 Hz  
GB 0  
PC 1.00

13C of VBAR-263/24

195.09

135.67  
135.08  
133.37  
133.26  
129.68  
129.60  
128.94  
128.89  
128.13  
127.04

82.19  
77.47  
77.15  
76.83  
76.35  
66.92  
66.73

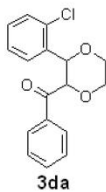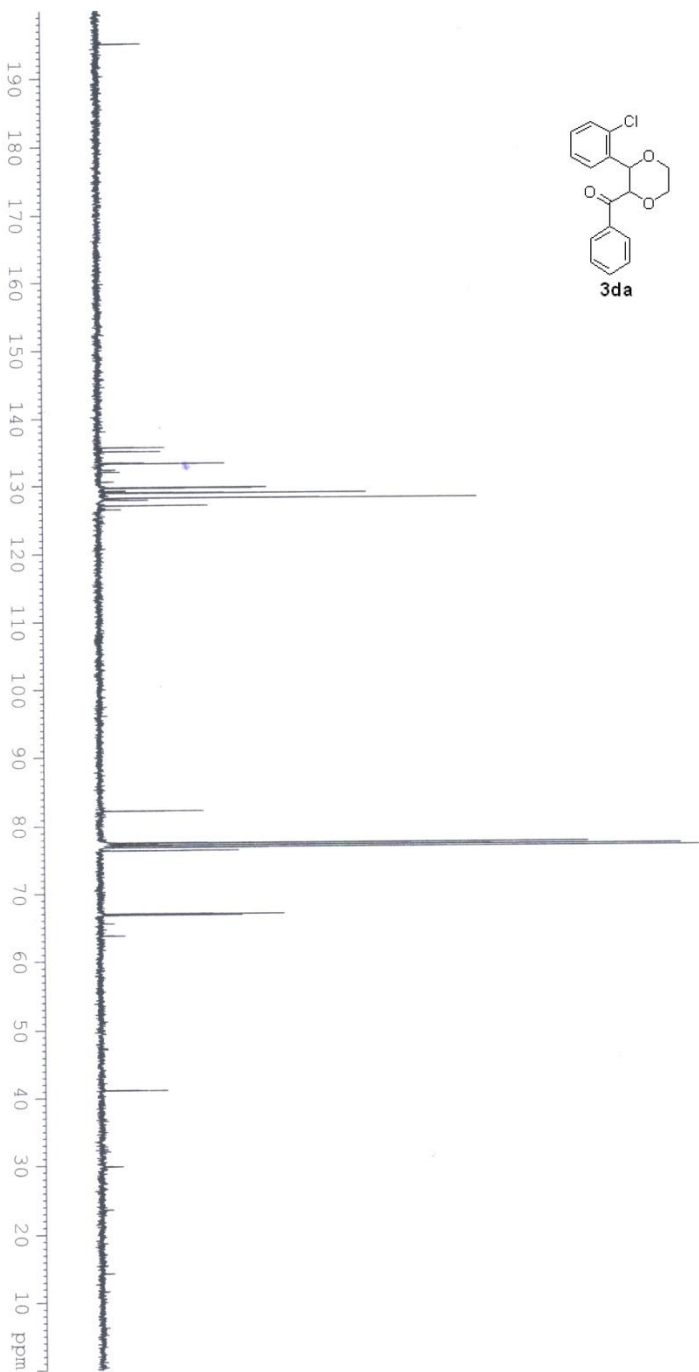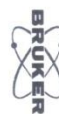

Current Data Parameters  
NAME Dr. A MAJE 2018  
EXPNO 592  
PROCNO 1

F2 - Acquisition Parameters  
Date\_ 20180724  
Time 10.22  
INSTRUM spect  
PROBHD 5 mm PABO BB/  
PULPROG zgpg30  
TD 32768  
SOLVENT CDCl3  
NS 640  
DS 2  
SWH 24038.461 Hz  
FIDRES 0.733596 Hz  
AQ 0.6815744 sec  
RG 87.66  
DW 20.800 usec  
DE 6.50 usec  
TE 300.4 K  
D1 2.00000000 sec  
D11 0.03000000 sec  
TD0 1

CHANNEL f1  
SF01 100.6278588 MHz  
NUC1 13C  
P1 8.90 usec  
PLW1 54.00000000 W

CHANNEL f2  
SF02 400.1516006 MHz  
NUC2 1H  
PCPDPRG12 waltz16  
PCPD2 90.00 usec  
PLW2 12.00000000 W  
PLW12 0.32231000 W  
PLW13 0.16212000 W

F2 - Processing parameters  
SI 16384  
SF 100.6177858 MHz  
WDW EM  
SSB 0  
LB 1.00 Hz  
GB 0  
FC 2.00

# <sup>1</sup>H of VBAR 15B

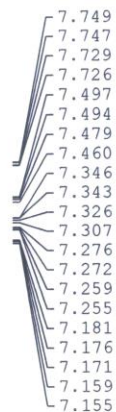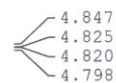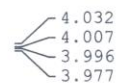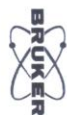

Current Data Parameters  
NAME Dr. A MAJE 2020  
EXPNO 351  
PROCNO 1

F2 - Acquisition Parameters  
Date\_ 20200916  
Time 17.47  
INSTRUM spect  
PROBHD 5 mm PABBO BB/  
PULPROG zg30  
TD 32768  
SOLVENT CDCl3  
NS 24  
DS 1  
SWH 8223.685 Hz  
FIDRES 0.250967 Hz  
AQ 1.9922944 sec  
RG 93.46  
DW 60.800 usec  
DE 6.50 usec  
TE 297.9 K  
D1 1.00000000 sec  
TD0 1

===== CHANNEL f1 =====  
SFO1 400.1524711 MHz  
NUC1 1H  
P1 14.75 usec  
PLW1 12.00000000 W

F2 - Processing parameters  
SI 16384  
SF 400.1500123 MHz  
WDW EM  
SSB 0  
LB 0.30 Hz  
GB 0  
PC 2.00

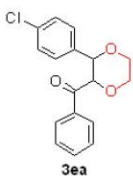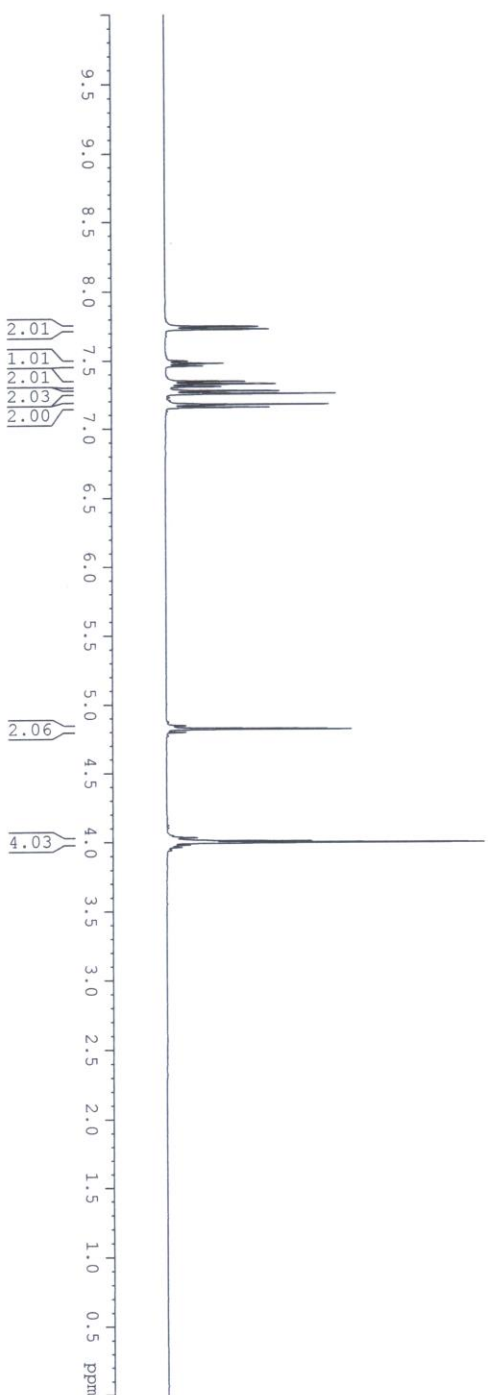

# <sup>13</sup>C of VBAR 15B

195.11

135.76  
135.66  
134.35  
133.69  
129.10  
128.89  
128.59

80.96  
79.05  
77.47  
77.15  
76.83  
66.76

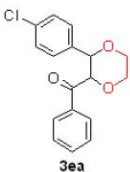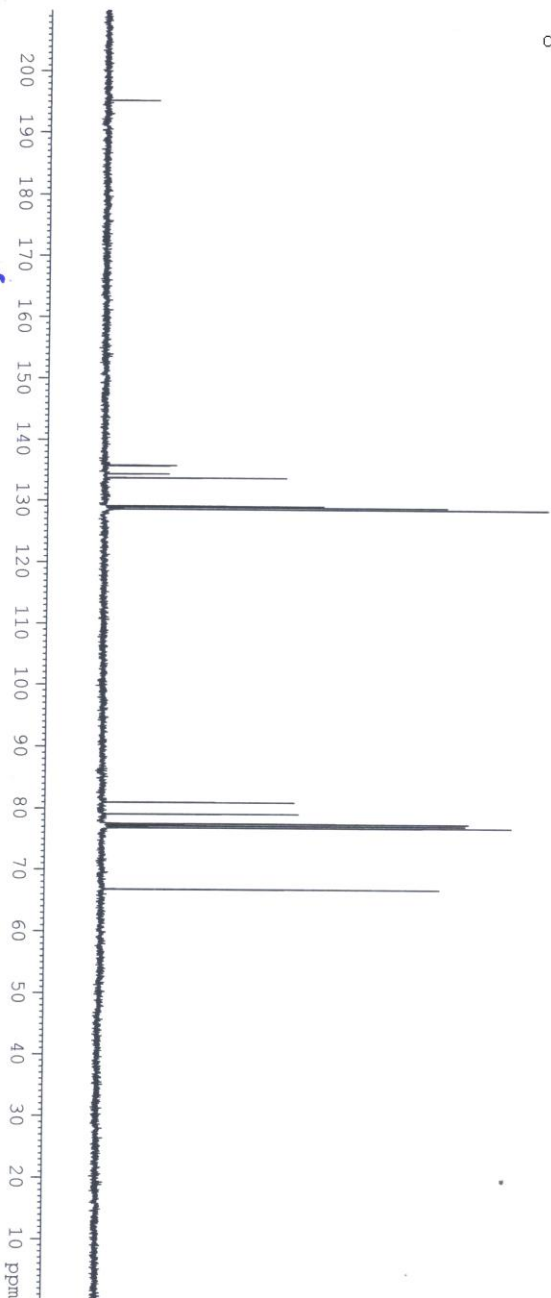

Current Data Parameters  
NAME Dr. A MAJE 2020  
EXPNO 352  
PROCNO 1

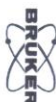

F2 - Acquisition Parameters  
Date\_ 20200916  
Time 18.03  
INSTRUM spect  
PROBHD 5 mm PABBO BB/  
PULPROG zgpg30  
TD 32768  
SOLVENT CDCl3  
NS 320  
DS 2  
SWH 24038.461 Hz  
FIDRES 0.733596 Hz  
AQ 0.6815744 sec  
RG 93.46  
DW 20.800 usec  
DE 6.50 usec  
TE 298.2 K  
D1 2.00000000 sec  
D11 0.03000000 sec  
TD0 1

CHANNEL f1  
SFO1 100.627858 MHz  
NUC1 13C  
P1 8.90 usec  
PLW1 54.00000000 W

CHANNEL f2  
SFO2 400.151606 MHz  
NUC2 1H  
CEDEPRG12 waltz16  
PCPD2 90.00 usec  
PLW2 12.00000000 W  
PLW12 0.32231000 W  
PLW13 0.16212000 W

F2 - Processing parameters  
SI 16384  
SF 100.6177855 MHz  
WDW EM  
SSB 0  
LB 1.00 Hz  
GB 0  
PC 1.40

7.742  
7.739  
7.721  
7.718  
7.495  
7.476  
7.458  
7.345  
7.324  
7.309  
7.306  
7.301  
7.293  
7.288  
7.259  
6.906  
6.884  
6.879  
6.862

4.866  
4.844  
4.833  
4.811

4.048  
4.024  
4.013  
3.993

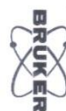

Current Data Parameters  
NAME Dr. A MAJEE 2018  
EXPNO 56  
PROCNO 1

F2 - Acquisition Parameters  
Date\_ 20180129  
Time\_ 17.05  
INSTRUM spect  
PROBHD 5 mm PABBO BB/  
PULPROG zg30  
TD 32768  
SOLVENT CDCl3  
NS 20  
DS 1  
SWH 8223.685 Hz  
FIDRES 0.250967 Hz  
AQ 1.9922944 sec  
RG 186.42  
DW 60.800 usec  
DE 6.50 usec  
TE 294.1 K  
D1 1.00000000 sec  
TD0 1

===== CHANNEL f1 =====  
SFO1 400.1524711 MHz  
NUC1 1H  
P1 14.75 usec  
PLW1 12.00000000 W  
F2 - Processing parameters  
SI 16384  
SF 400.150097 MHz  
WDW EM  
SSB 0  
LB 0.30 Hz  
GB 0  
PC 1.00

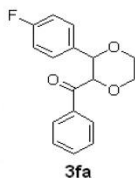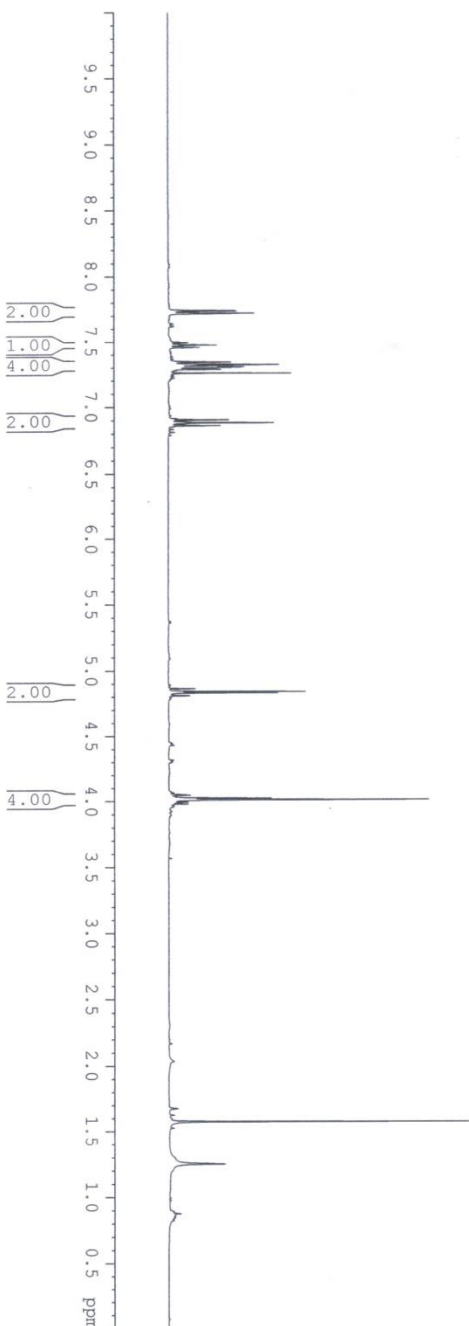

<sup>13</sup>C of VBAR 263/2

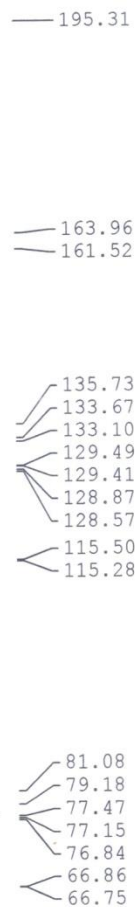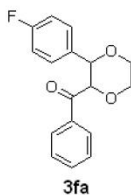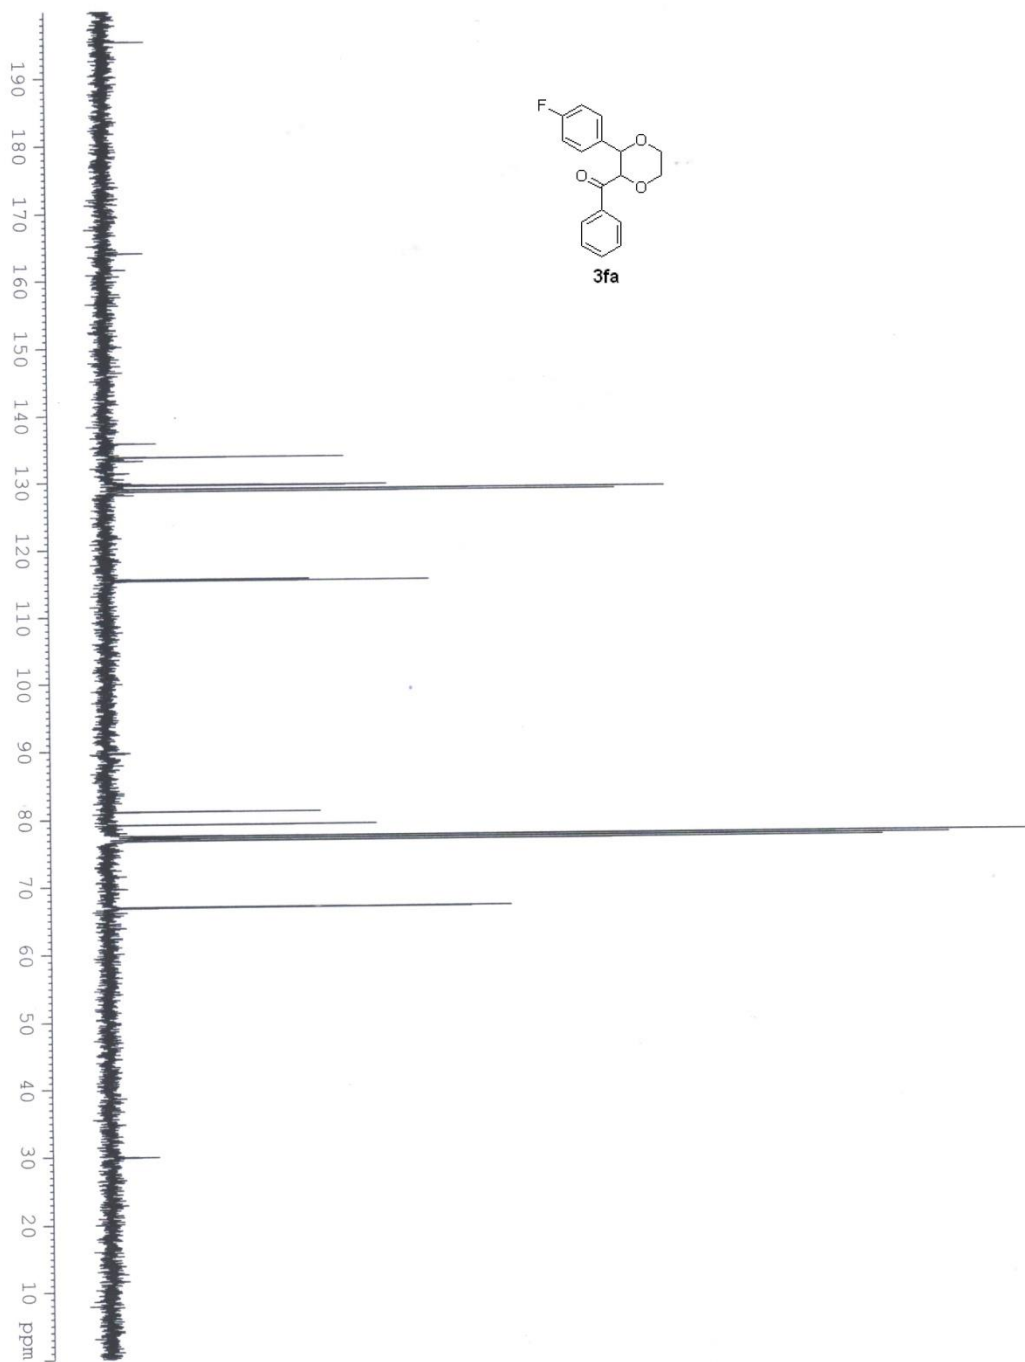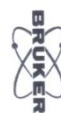

Current Data Parameters  
 NAME Dr. A MAJE 2018  
 EXPNO 57  
 PROCNO 1

F2 - Acquisition Parameters  
 Date\_ 20180129  
 Time 17.56  
 INSTRUM spect  
 PROBD 5 mm PABO BB/  
 PULPROG zgpg  
 TD 32768  
 SOLVENT CDCl3  
 NS 1024  
 DS 2  
 SWH 24038.461 Hz  
 FIDRES 0.733596 Hz  
 AQ 0.681574 sec  
 RG 186.42  
 DW 20.800 usec  
 DE 6.50 usec  
 TE 295.5 K  
 D1 2.00000000 sec  
 D11 0.03000000 sec  
 TDO 1

CHANNEL f1  
 SFO1 100.6278588 MHz  
 NUC1 13C  
 P1 8.90 usec  
 PLW1 54.00000000 W

CHANNEL f2  
 SFO2 400.1516006 MHz  
 NUC2 1H  
 CPDPRG12 waltz16  
 PCPD2 90.00 usec  
 PLW2 12.00000000 W  
 PLW12 0.32231000 W

F2 - Processing Parameters  
 SI 16384  
 SF 100.6177845 MHz  
 WDW EM  
 SSB 0  
 LB 1.00 Hz  
 GB 0  
 PC 1.40



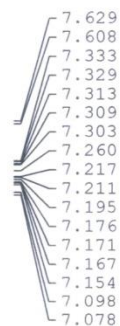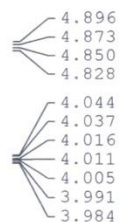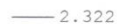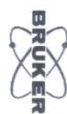

Current Data Parameters  
NAME Dr. A MAJE 2018  
EXPNO 112  
PROCNO 1

F2 - Acquisition Parameters  
Date\_ 20180215  
Time 11.33  
INSTRUM spect  
PROBHD 5 mm PABBO BB/  
PULPROG zg30  
TD 32768  
SOLVENT CDCl3  
NS 32  
DS 1  
SWH 8223.685 Hz  
FIDRES 0.250967 Hz  
AQ 1.9922944 sec  
RG 106.66  
DM 60.800 usec  
DE 6.50 usec  
TE 296.0 K  
D1 1.00000000 sec  
TD0 1

===== CHANNEL f1 =====  
SE01 400.1524711 MHz  
NUC1 1H  
P1 14.75 usec  
PLW1 12.00000000 W

F2 - Processing parameters  
SI 16384  
SF 400.1500094 MHz  
WDW EM  
SSB 0  
LB 0.30 Hz  
GB 0  
PC 1.00

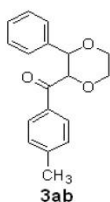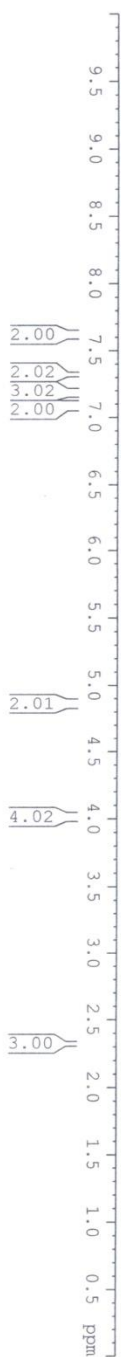

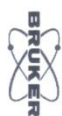

195.01

144.41  
137.16  
133.39  
129.16  
128.97  
128.55  
128.43  
127.63

81.02  
79.97  
77.48  
77.16  
76.84  
66.79  
66.71

21.77

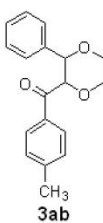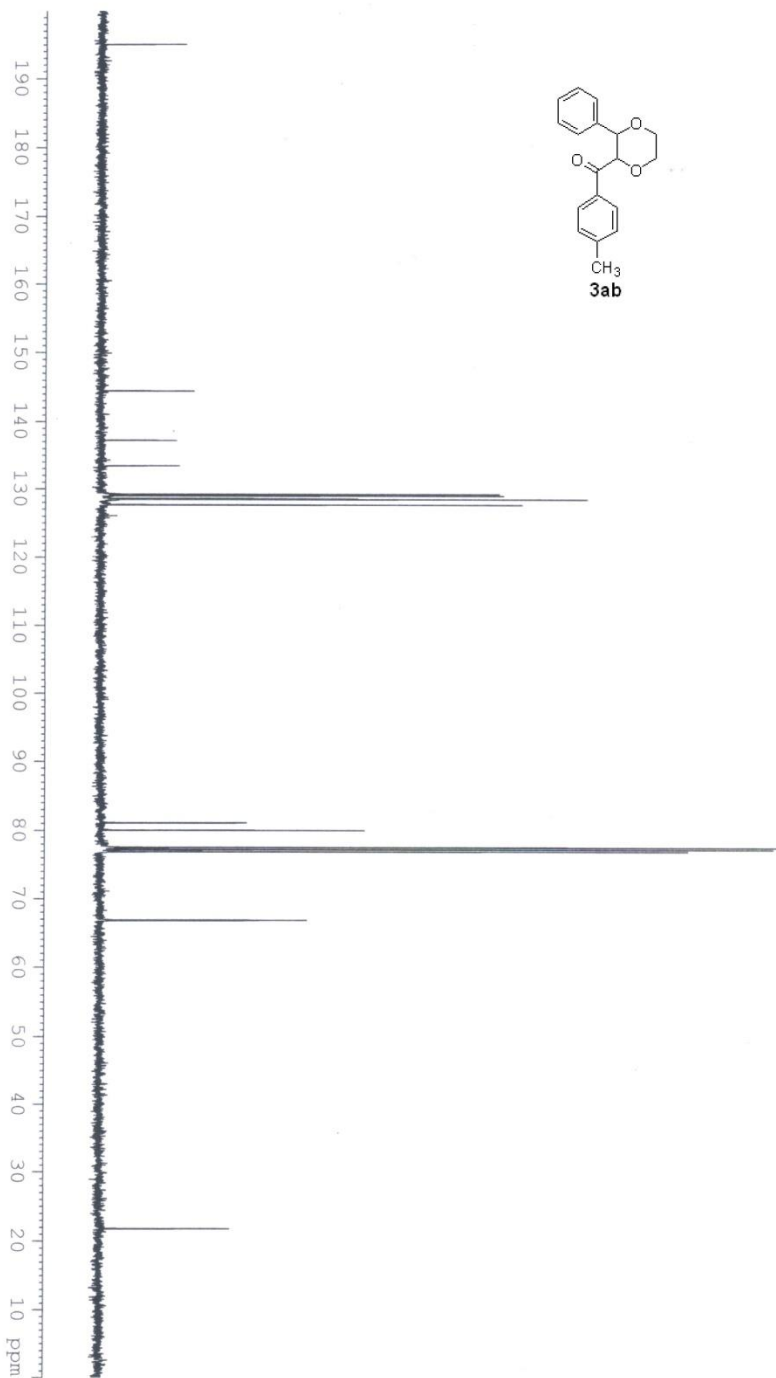

Current Data Parameters  
NAME Dr. A MAJE 2018  
EXNO 113  
PROCNO 1

F2 - Acquisition Parameters  
Date\_ 20180215  
Time 11.51  
INSTRUM spect  
PROBHD 5 mm PABBO BB/  
PULPROG zgpg30  
TD 32768  
SOLVENT CDCl3  
NS 312  
DS 2  
SWH 24038.461 Hz  
FIDRES 0.733596 Hz  
AQ 0.6815744 sec  
RG 106.66  
DW 20.800 usec  
DE 6.50 usec  
TE 296.0 K  
D1 2.00000000 sec  
D11 0.03000000 sec  
TD0 1

CHANNEL F1  
SFO1 100.6278588 MHz  
NUC1 13C  
P1 8.90 usec  
PLW1 54.00000000 W

CHANNEL F2  
SFO2 400.1516006 MHz  
NUC2 1H  
CPDPRG12 waltz16  
PCPD2 90.00 usec  
PLW2 12.00000000 W  
PLW12 0.32231000 W  
PLW13 0.16212000 W

F2 - Processing parameters  
SI 16384  
SF 100.6177866 MHz  
WDW EM  
SSB 0  
LB 1.00 Hz  
GB 0  
PC 1.40

# <sup>1</sup>H of VBAR-263/7

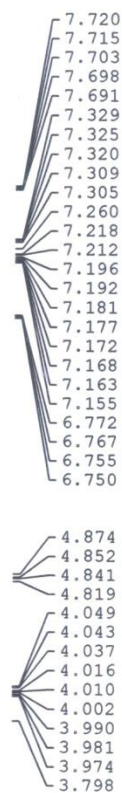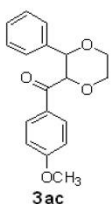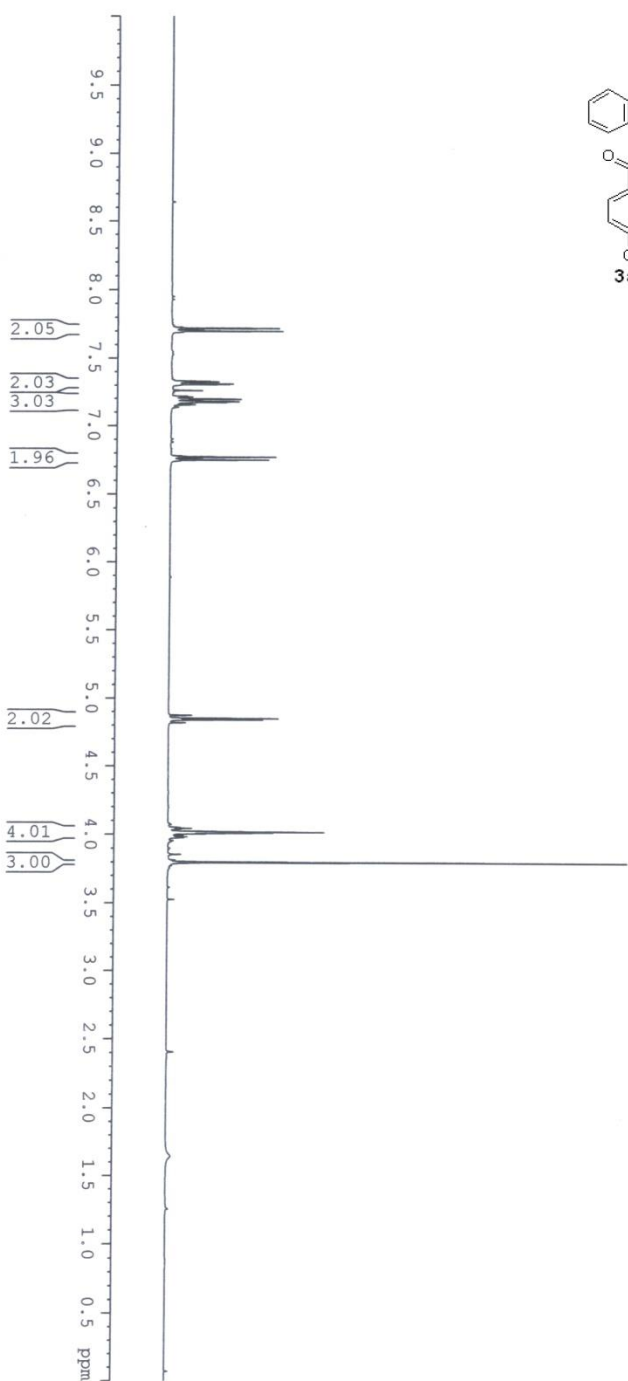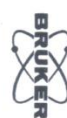

Current Data Parameters  
NAME Dr. A MAJEE 2018  
EXPNO 118  
PROCNO 1

F2 - Acquisition Parameters  
Date\_ 20180216  
Time\_ 17.02  
INSTRUM spect  
PROBHD 5 mm PABBO BB/  
PULPROG zg30  
TD 32768  
SOLVENT CDCl3  
NS 16  
DS 1  
SWH 8223.685 Hz  
FIDRES 0.250967 Hz  
AQ 1.9922944 sec  
RG 106.66  
DW 60.800 usec  
DE 6.50 usec  
TE 295.6 K  
D1 1.00000000 sec  
TD0 1

===== CHANNEL f1 =====  
SFO1 400.1524711 MHz  
NUC1 1H  
P1 14.75 usec  
PLW1 12.00000000 W

F2 - Processing parameters  
SI 16384  
SF 400.1500095 MHz  
WDW EM  
SSB 0  
LB 0.30 Hz  
GB 0  
PC 1.00

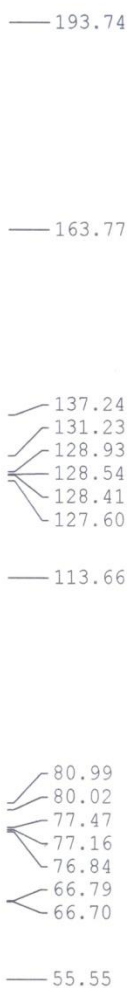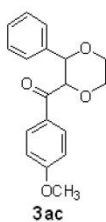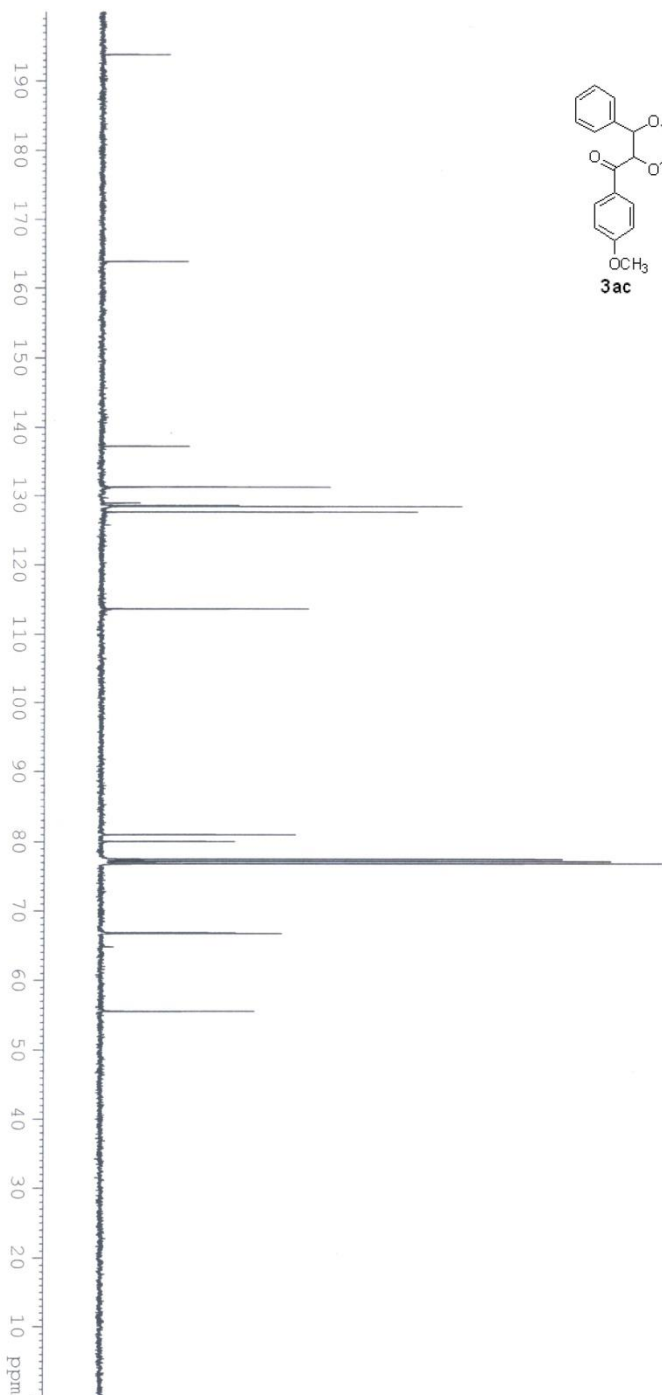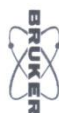

Current Data Parameters  
NAME Dr. A MAJEE 2018  
EXPNO 119  
PROCNO 1

F2 - Acquisition Parameters  
Date\_ 20180216  
Time 17.35  
INSTRUM spect  
PROBHD 5 mm PABBO BB/  
PULPROG zgpg30  
TD 32768  
SOLVENT CDCl3  
NS 640  
DS 2  
SWH 24038.461 Hz  
FIDRES 0.733596 Hz  
AQ 0.6815744 sec  
RG 106.66  
DW 20.800 usec  
DE 6.50 usec  
TE 296.3 K  
D1 2.00000000 sec  
D11 0.03000000 sec  
TD0 1

===== CHANNEL f1 =====  
SFO1 100.6278588 MHz  
NUC1 13C  
P1 8.90 usec  
PLW1 54.00000000 W

===== CHANNEL f2 =====  
SFO2 400.1516006 MHz  
NUC2 1H  
CPRPG12 waltz16  
PCPD2 90.00 usec  
PLW2 12.00000000 W  
PLW12 0.32231000 W  
PLW13 0.16212000 W

F2 - Processing parameters  
SI 16384  
SF 100.6177866 MHz  
WDW EM  
SSB 0  
LB 1.00 Hz  
GB 0  
PC 1.40

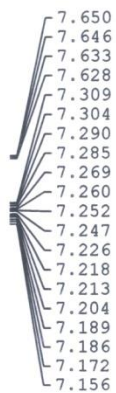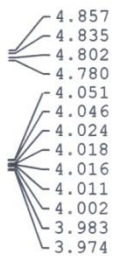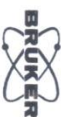

Current Data Parameters  
NAME Dr. A. MAJEE 2018  
EXPNO 147  
PROCNO 1

F2 - Acquisition Parameters  
Date\_ 20180223  
Time\_ 17.57  
INSTRUM spect  
PROBHD 5 mm PABBO BH/  
PULPROG zg30  
TD 32768  
SOLVENT CDCl3  
NS 16  
DS 1  
SWH 8223.685 Hz  
FIDRES 0.250967 Hz  
AQ 1.9922944 sec  
RG 106.66  
DW 60.800 usec  
DE 6.50 usec  
TE 296.0 K  
D1 1.00000000 sec  
TD0 1

===== CHANNEL f1 =====  
SFO1 400.1524711 MHz  
NUC1 <sup>1</sup>H  
P1 14.75 usec  
PLW1 12.00000000 W  
F2 - Processing parameters  
SI 16384  
SF 400.1500097 MHz  
WDW EM  
SSB 0  
LB 0.30 Hz  
GB 0  
PC 1.00

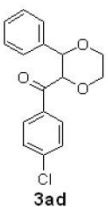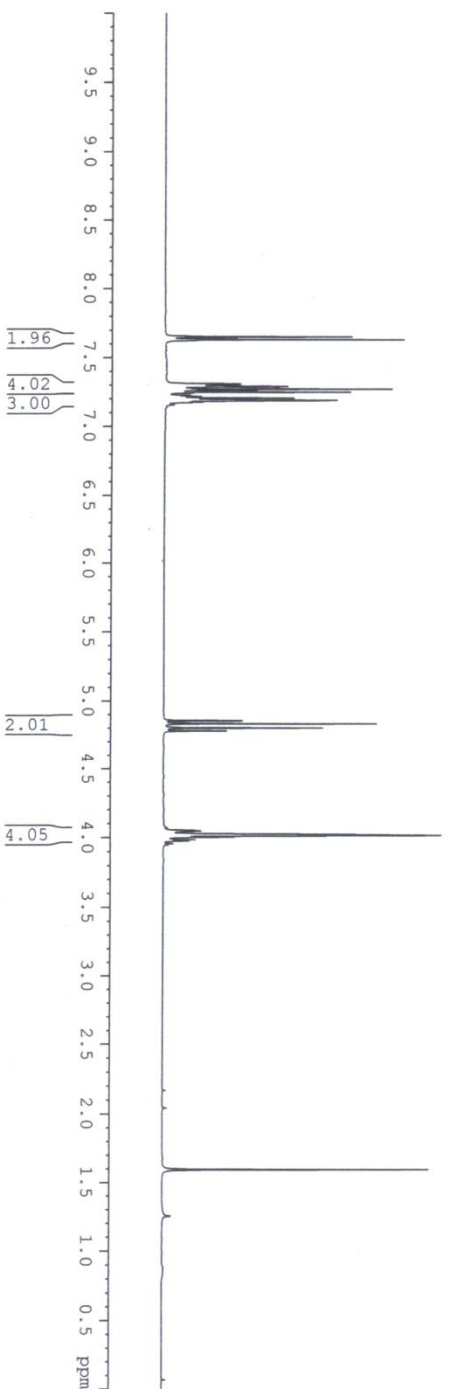

<sup>13</sup>C of VBAR-263/8

— 194.37

139.96  
136.92  
134.13  
130.21  
128.77  
128.54  
127.56

81.31  
80.01  
77.47  
77.15  
76.83  
66.77  
66.71

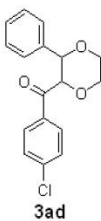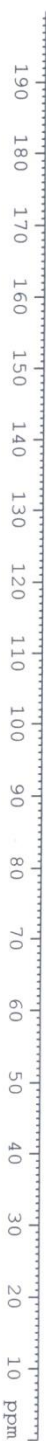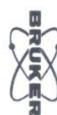

Current Data Parameters  
NAME Dr. A. MAJE 2018  
EXPNO 148  
PROCNO 1

F2 - Acquisition Parameters  
Date\_ 20180223  
Time 18.12

INSTRUM spect  
PROBHD 5 mm PABBO BB/  
PULPROG zgpg30  
TD 32768  
SOLVENT CDCl3  
NS 248

DS 2  
SWH 24038.461 Hz  
FIDRES 0.733596 Hz  
AQ 0.6815744 sec  
RG 106.66  
DM 20.800 usec  
DE 6.50 usec  
TE 296.4 K  
D11 2.00000000 sec  
D1 0.03000000 sec  
TD0 1

CHANNEL F1  
SFO1 100.6278588 MHz  
NUC1 13C  
P1 8.90 usec  
PLW1 54.00000000 W

CHANNEL F2  
SFO2 400.1516006 MHz  
NUC2 1H  
CPDPRG12 waltz16  
PCPD2 90.00 usec  
PLW2 12.00000000 W  
PLW12 0.32231000 W  
PLW13 0.16212000 W

F2 - Processing Parameters  
SI 16384  
SF 100.6177861 MHz  
WDW EM  
SSB 0  
LB 1.00 Hz  
GB 0  
PC 1.40

<sup>1</sup>H of VBAR 263/27

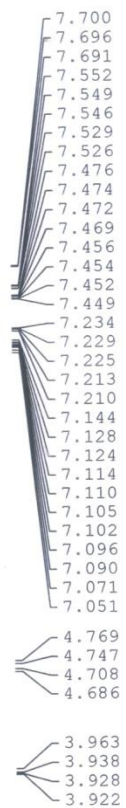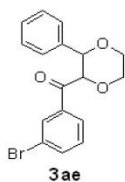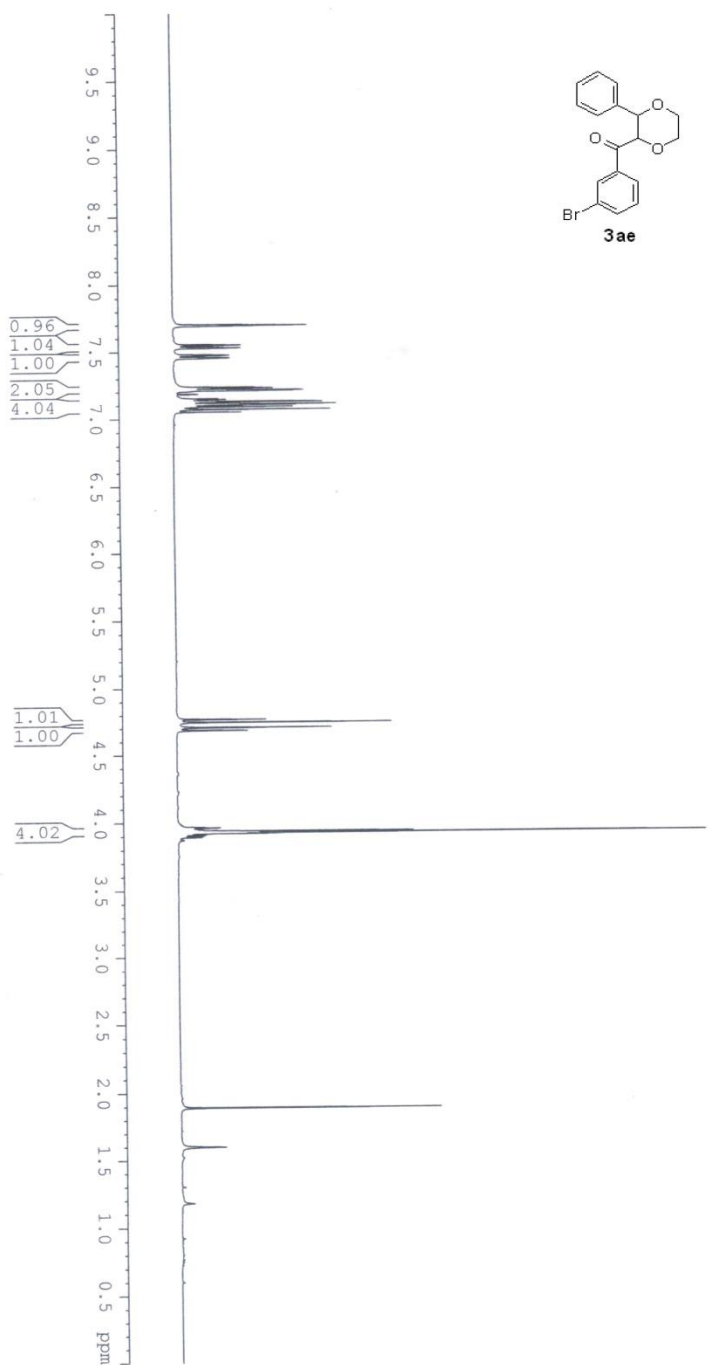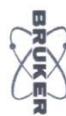

Current Data Parameters  
NAME Dr. A MAJE 2018  
EXPNO 535  
PROCNO 1

F2 - Acquisition Parameters  
Date\_ 20180701  
Time 11.21  
INSTRUM spect  
PROBHD 5 mm PABBO BB/  
PULPROG zg30  
TD 32768  
SOLVENT CDCl3  
NS 24  
DS 1  
SWH 8223.685 Hz  
FIDRES 0.250967 Hz  
AQ 1.9922944 sec  
RG 47.25  
DW 60.800 usec  
DE 6.50 usec  
TE 300.0 K  
D1 1.00000000 sec  
TDO 1

===== CHANNEL f1 =====  
SFO1 400.1524711 MHz  
NUC1 1H  
P1 14.75 usec  
PLW1 12.00000000 W

F2 - Processing parameters  
SI 16384  
SF 400.1500398 MHz  
WDW EM  
SSB 0  
LB 0.30 Hz  
GB 0  
PC 1.00

<sup>13</sup>C OF VBSSM 263/27

194.19

137.48  
136.81  
136.17  
131.71  
129.93  
128.76  
128.48  
127.51  
127.24  
122.66

81.31  
79.94  
77.47  
77.15  
76.83  
66.69  
66.65

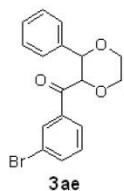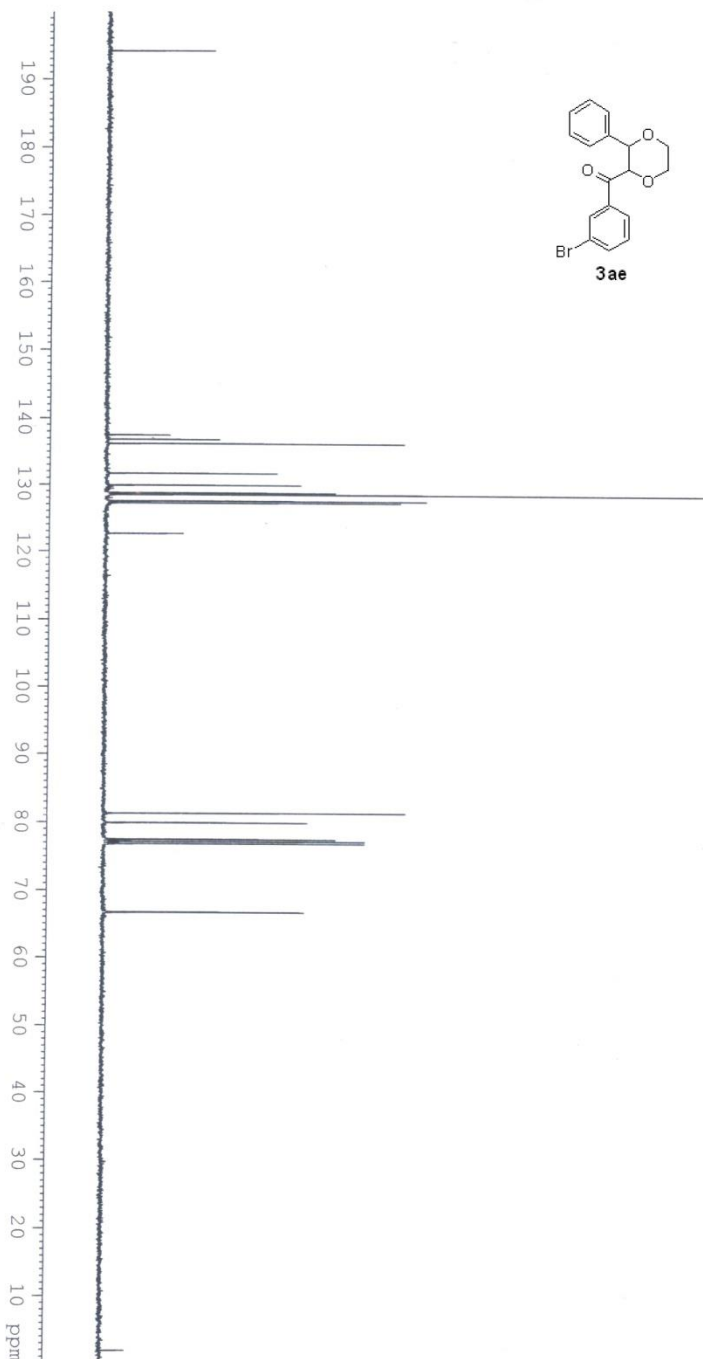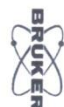

Current Data Parameters  
NAME Dr. A. MAJE 2018  
EXPNO 536  
PROCNO 1

F2 - Acquisition Parameters  
Date\_ 20180701  
Time 11.41  
INSTRUM spect  
PROBHD 5 mm PABBO BB/  
PULPROG zgpg30  
TD 32768  
SOLVENT CDCl3  
NS 320  
DS 2  
SWH 24038.461 Hz  
FIDRES 0.733596 Hz  
AQ 0.6815744 sec  
RG 77.59  
IW 20.800 usec  
DE 6.50 usec  
TE 300.5 K  
D1 2.00000000 sec  
D11 0.03000000 sec  
TD0 1

CHANNEL f1  
SFO1 100.6278588 MHz  
NUC1 <sup>13</sup>C  
P1 8.90 usec  
PLW1 54.00000000 W

CHANNEL f2  
SFO2 400.1516006 MHz  
NUC2 <sup>1</sup>H  
CPDPRG12 waltz16  
PCPD2 90.00 usec  
PLW2 12.00000000 W  
PLW12 0.32231000 W  
PLW13 0.16212000 W

F2 - Processing parameters  
SI 16384  
SF 100.6177916 MHz  
WDW EM  
SSB 0  
LB 1.00 Hz  
GB 0  
PC 2.00



7.657  
7.636  
7.259  
7.211  
7.191  
7.113  
7.093  
7.011  
6.991

4.863  
4.841  
4.822  
4.800

4.019  
3.998  
3.994  
3.973

2.332  
2.223

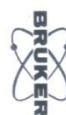

Current Data Parameters  
NAME Dr. A MAJEE 2018  
EXPNO 569  
PROCNO 1

F2 - Acquisition Parameters  
Date\_ 20180714  
Time\_ 17.51  
INSTRUM spect  
PROBHD 5 mm PABBO BB/  
PULPROG zg30  
TD 32768  
SOLVENT CDCl3  
NS 24  
DS 1  
SWH 8223.685 Hz  
FIDRES 0.250967 Hz  
AQ 1.9932944 sec  
RG 67.81  
DW 60.800 usec  
DE 6.50 usec  
TE 300.8 K  
D1 1.00000000 sec  
TD0 1

===== CHANNEL f1 =====  
SFO1 400.1524711 MHz  
NUC1 1H  
P1 14.75 usec  
PLW1 12.00000000 W  
F2 - Processing parameters  
SI 16384  
SF 400.150097 MHz  
WDW EM  
SSB 0  
LB 0.30 Hz  
GB 0  
PC 1.50

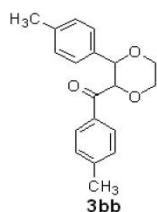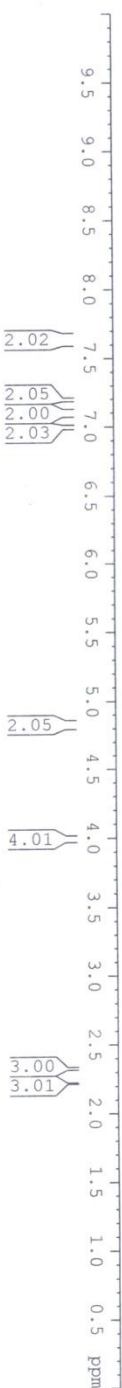

195.01

144.29  
138.23  
134.25  
133.46  
129.12  
129.07  
129.04  
127.54

81.14  
79.71  
77.47  
77.15  
76.84  
66.79  
66.71

21.73  
21.21

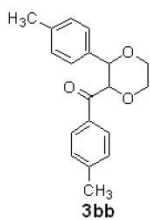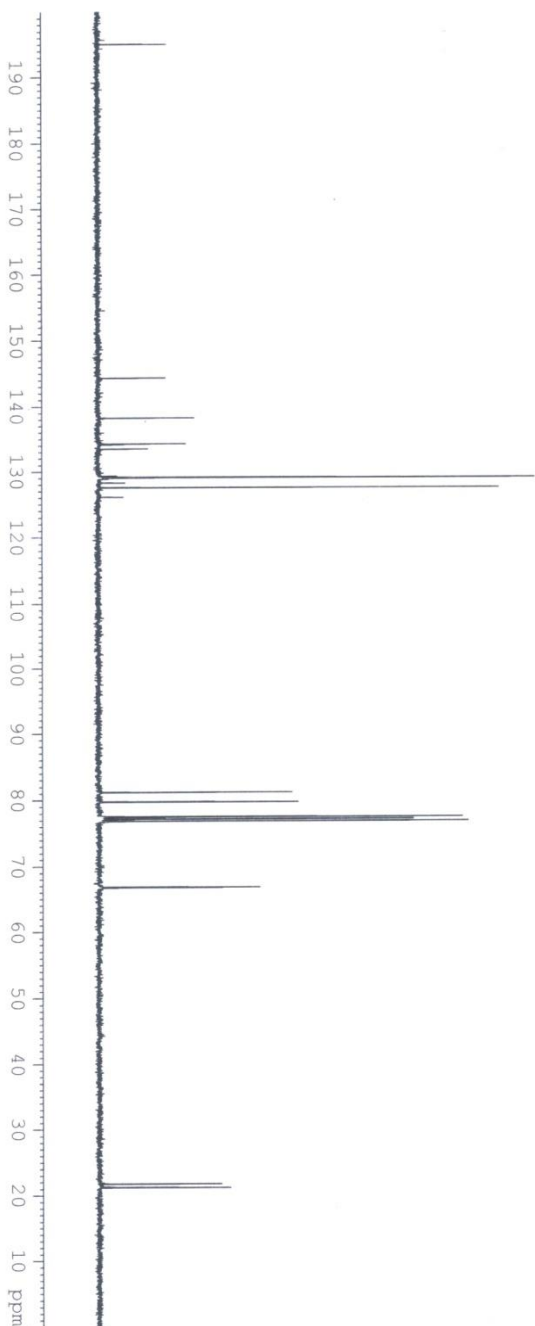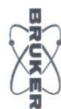

Current Data Parameters  
NAME Dr. A MAJEE 2018  
EXPNO 570  
PROCNO 1

F2 - Acquisition Parameters  
Date\_ 20180714  
Time 18.15  
INSTRUM spect  
PROBHD 5 mm PABBO BB/  
PULPROG zgpg30  
TD 32768  
SOLVENT CDCl3  
NS 400  
DS 2  
SWH 24038.461 Hz  
FIDRES 0.733596 Hz  
AQ 0.6815744 sec  
RG 87.66  
DW 20.800 usec  
DE 6.50 usec  
TE 301.3 K  
D1 2.00000000 sec  
D11 0.03000000 sec  
TDO 1

CHANNEL F1  
SFO1 100.6278588 MHz  
NUC1 13C  
P1 8.90 usec  
PL1 54.00000000 W

CHANNEL F2  
SFO2 400.1516006 MHz  
NUC2 1H  
CPDPRG12 waltz16  
PCPD2 90.00 usec  
PLW2 12.00000000 W  
PLW12 0.32231000 W  
PLW13 0.16212000 W

F2 - Processing parameters  
SI 16384  
SE 100.6177867 MHz  
WDW EM  
SSB 0  
LB 1.00 Hz  
GB 0  
PC 2.00

7.608  
7.602  
7.597  
7.585  
7.580  
7.574  
7.219  
7.214  
7.209  
7.196  
7.192  
7.114  
7.094  
6.947  
6.928

4.761  
4.738  
4.699  
4.677  
3.970  
3.966  
3.958  
3.942  
3.933  
3.922

2.168

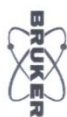

Current Data Parameters  
NAME Dr. A MAJE 2018  
EXPNO 244  
PROCNO 1

F2 - Acquisition Parameters  
Date\_ 20180403  
Time\_ 16.09  
INSTRUM spect  
PROBHD 5 mm PABO BB/  
PULPROG zg30  
TD 32768  
SOLVENT CDCl3  
NS 64  
DS 1  
SWH 8223.685 Hz  
FIDRES 0.250967 Hz  
AQ 1.9922944 sec  
RG 186.42  
DW 60.800 usec  
DE 6.50 usec  
TE 296.0 K  
D1 1.00000000 sec  
TD0 1

===== CHANNEL f1 =====  
SFO1 400.1524711 MHz  
NUC1 1H  
P1 14.75 usec  
PLM1 12.00000000 W  
F2 - Processing parameters  
SI 16384  
SF 400.1500368 MHz  
WDW EM  
SSB 0  
LB 0.30 Hz  
GB 0  
PC 1.00

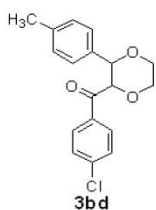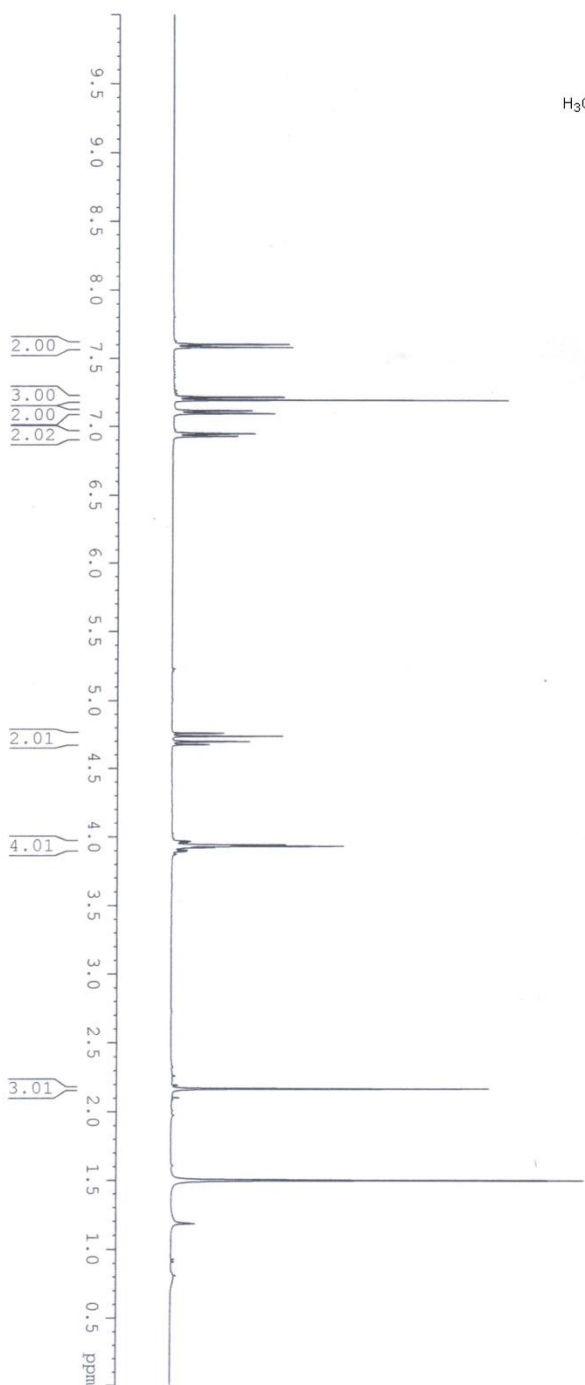

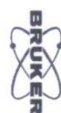

Current Data Parameters  
NAME Dr. A MAUE 2018  
EXPNO 249  
PROCNO 1

F2 - Acquisition Parameters  
Date\_ 20180403  
Time 18.05  
INSTRUM spect  
PROBHD 5 mm PABBO BB/  
PULPROG zgpg30  
TD 32768  
SOLVENT CDCl3  
NS 1024  
DS 2  
SWH 24038.461 Hz  
FIDRES 0.733596 Hz  
AQ 0.6815744 sec  
RG 120.16  
DW 20.800 usec  
DE 6.50 usec  
TE 297.0 K  
D1 2.00000000 sec  
D11 0.03000000 sec  
TD0 1

CHANNEL F1  
SFO1 100.6278588 MHz  
NUC1 <sup>13</sup>C  
P1 8.90 usec  
PL1 54.00000000 W

CHANNEL F2  
SFO2 400.1516006 MHz  
NUC2 <sup>1</sup>H  
CPCPRG12 waltz16  
PCPD2 90.00 usec  
PLM2 12.00000000 W  
PLM12 0.32231000 W  
PLM13 0.16212000 W

F2 - Processing parameters  
SI 16384  
SF 100.617980 MHz  
WDW EM  
SSB 0  
LB 1.00 Hz  
GB 0  
FC 1.40

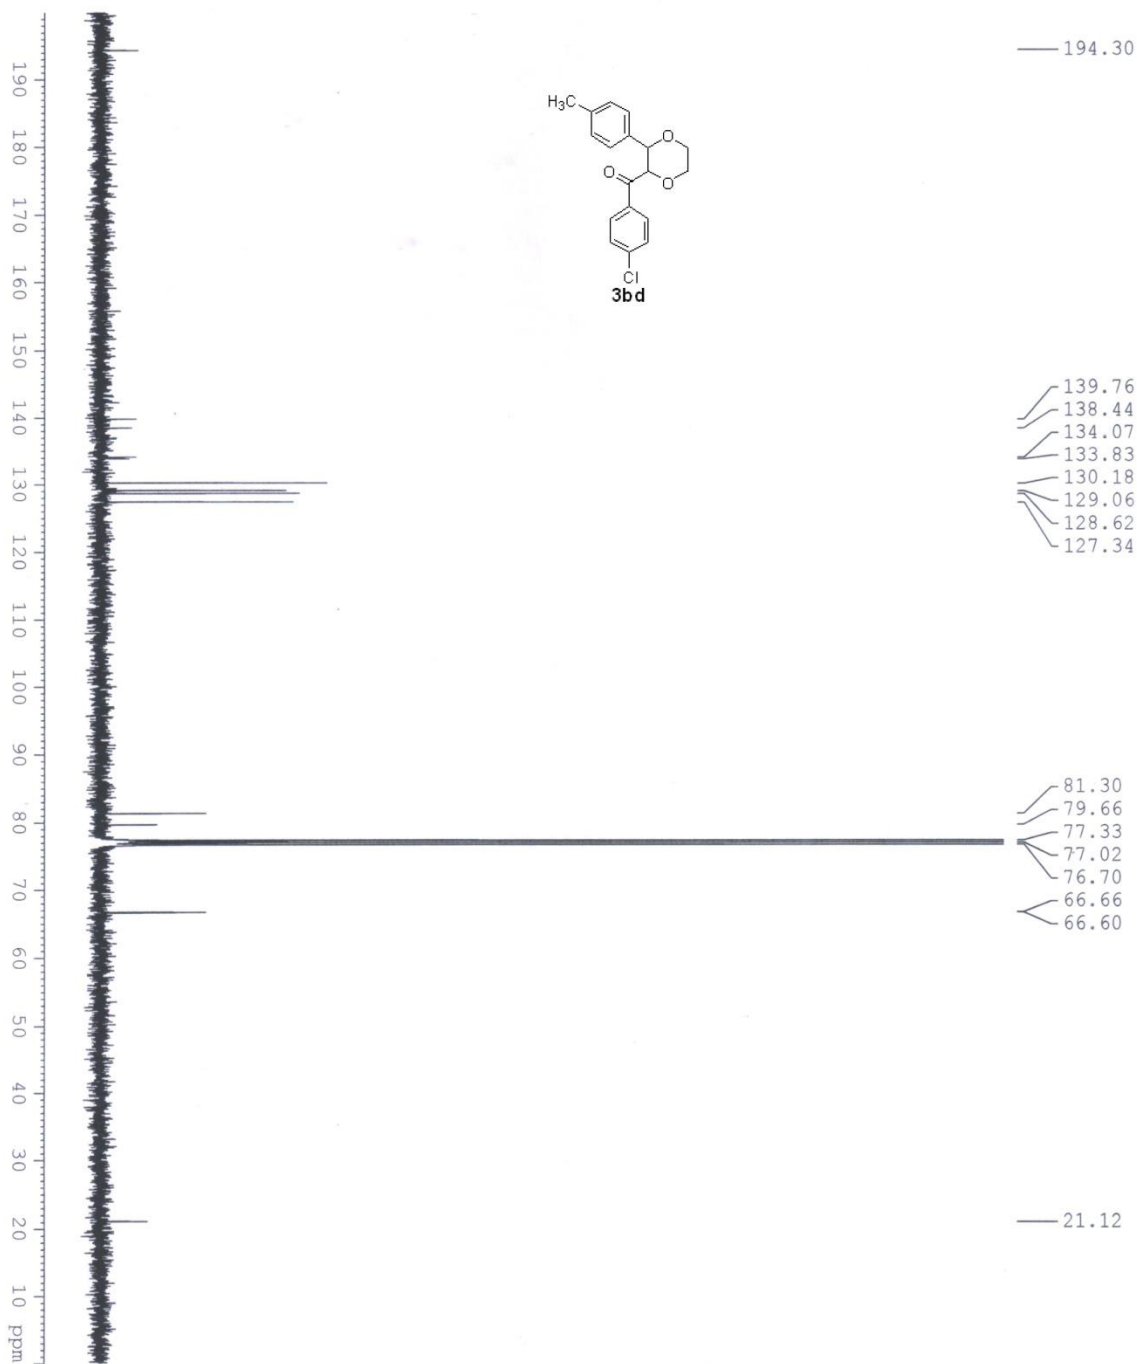

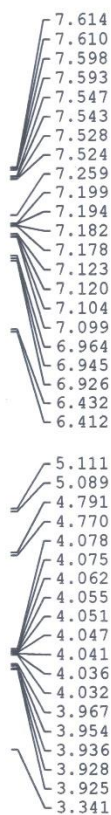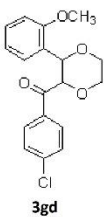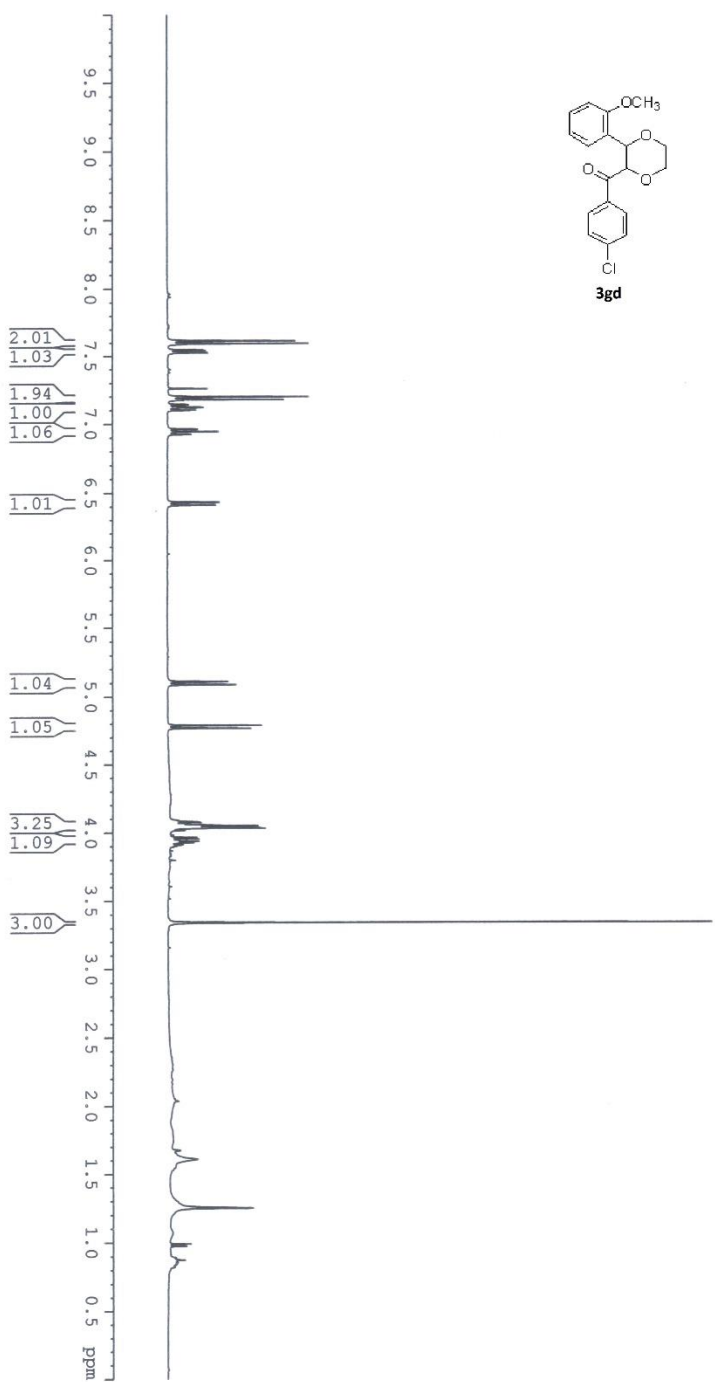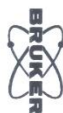

Current Data Parameters  
NAME Dr. A MAJEE 2018  
EXPNO 227  
PROCNO 1

F2 - Acquisition Parameters  
Date\_ 20180329  
Time 16.28  
INSTRUM spect  
PROBHD 5 mm PABBO BB/  
PULPROG zg30  
TD 32768  
SOLVENT CDCl3  
NS 32  
DS 1  
SWH 8223.685 Hz  
FIDRES 0.250967 Hz  
AQ 1.9922944 sec  
RG 87.66  
DM 60.800 usec  
DE 6.50 usec  
TE 298.9 K  
D1 1.00000000 sec  
TD0 1

===== CHANNEL f1 =====  
SFO1 400.1524711 MHz  
NUC1 1H  
P1 14.75 usec  
PLW1 12.00000000 W  
F2 - Processing parameters  
SI 16384  
SF 400.1500097 MHz  
WDW EM  
SSB 0  
LB 0.30 Hz  
GB 0  
PC 1.00

193.87  
155.85  
139.26  
134.22  
130.05  
129.61  
128.16  
127.36  
125.62  
120.88  
109.89  
84.00  
77.47  
77.15  
76.84  
74.55  
67.13  
66.69  
54.47

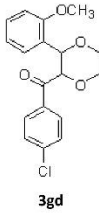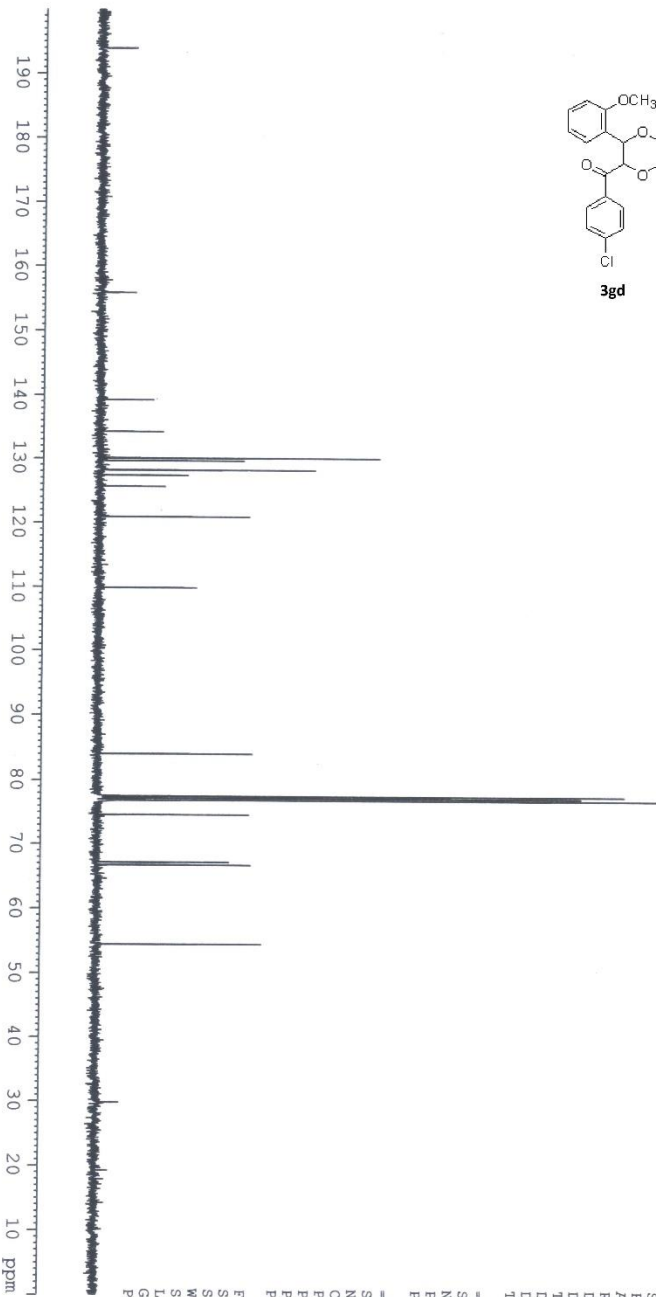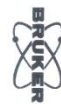

Current Data Parameters  
NAME Dr. A. MATEE 2018  
EXPNO 228  
PROCNO 1

F2 - Acquisition Parameters  
Date\_ 20180329  
Time 16.46  
INSTRUM spect  
PROBHD 5 mm PABBO BB/  
PULPROG zgpg30  
TD 32768  
SOLVENT CDCl3  
NS 320  
DS 2  
SWH 24038.461 Hz  
FIDRES 0.733596 Hz  
AQ 0.6815744 sec  
RG 47.25  
DW 20.800 usec  
DE 6.50 usec  
TE 299.6 K  
D1 2.00000000 sec  
D11 0.03000000 sec  
TD0 1

CHANNEL F1  
SF01 100.627858 MHz  
NUC1 13C  
P1 8.90 usec  
PLM1 54.00000000 W

CHANNEL F2  
SF02 400.151606 MHz  
NUC2 1H  
CPCPRG12 waltz16  
PCPD2 90.00 usec  
PLM2 12.00000000 W  
PLM12 0.32231000 W  
PLM13 0.16212000 W

F2 - Processing parameters  
SI 16384  
SF 100.6177851 MHz  
WDW EM  
SSB 0  
LB 1.00 Hz  
GB 0  
PC 1.40

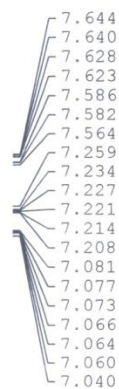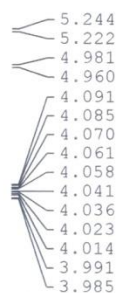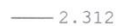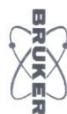

Current Data Parameters  
NAME Dr. A MAJEE 2018  
EXPNO 596  
PROCNO 1

F2 - Acquisition Parameters  
Date\_ 20180724  
Time\_ 14.43  
INSTRUM spect  
PROBHD 5 mm PABBO BB/  
PULPROG zg30  
TD 32768  
SOLVENT CDCl3  
NS 24  
DS 1  
SWH 8223.685 Hz  
FIDRES 0.250967 Hz  
AQ 1.9922944 Sec  
RG 93.46  
DW 60.800 usec  
DE 6.50 usec  
TE 302.2 K  
D1 1.00000000 Sec  
TD0 1

===== CHANNEL f1 =====  
SF01 400.1524711 MHz  
NUC1 1H  
P1 14.75 usec  
PLW1 12.00000000 W

F2 - Processing Parameters  
SI 16384  
SF 400.1500097 MHz  
WDW EM  
SSB 0  
LB 0.30 Hz  
GB 0  
PC 1.00

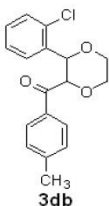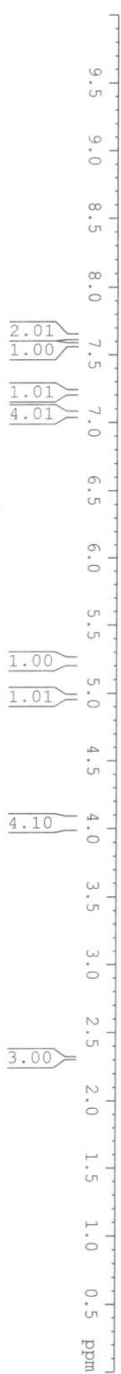

— 194.58

144.18  
135.23  
133.50  
133.22  
129.66  
129.60  
129.06  
129.00  
128.89  
127.04

82.10  
77.47  
77.16  
76.84  
76.37  
66.94  
66.74

— 21.75

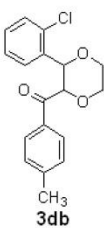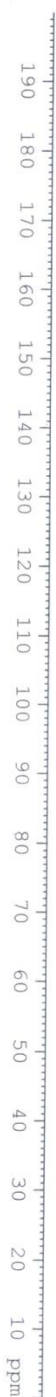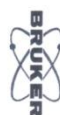

Current Data Parameters  
NAME Dr. A MAJEE 2018  
EXPNO 597  
PROCNO 1

F2 - Acquisition Parameters  
Date\_ 20180724  
Time\_ 15.15  
INSTRUM spect  
PROBHD 5 mm PABBO BB/  
PULPROG zgpg30  
TD 32768  
SOLVENT CDCl3  
NS 640  
DS 2  
SWH 24038.461 Hz  
FIDRES 0.733596 Hz  
AQ 0.6815744 sec  
RG 87.66  
DE 20.800 usec  
TE 303.0 K  
D1 2.00000000 sec  
D11 0.03000000 sec  
TD0 1

CHANNEL f1  
SFO1 100.6278588 MHz  
NUC1 13C  
P1 8.90 usec  
PLW1 54.00000000 W

CHANNEL f2  
SFO2 400.1516006 MHz  
NUC2 1H  
CPDPRG12 waltz16  
PCPD2 90.00 usec  
PLW2 12.00000000 W  
PLW12 0.32231000 W  
PLW13 0.16212000 W

F2 - Processing parameters  
SI 16384  
SF 100.617829 MHz  
WDW EM  
SSB 0  
LB 1.00 Hz  
GB 0  
PC 2.00



<sup>1</sup>H of VBAR-263/12

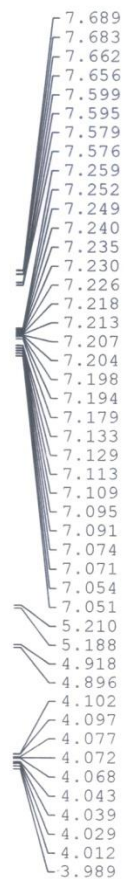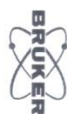

Current Data Parameters  
NAME Dr. A MAJE 2018  
EXPNO 229  
PROCNO 1

F2 - Acquisition Parameters  
Date\_ 20180329  
Time 16.56  
INSTRUM spect  
PROBHD 5 mm PABBO BB/  
PULPROG zg30  
TD 32768  
SOLVENT CDCl3  
NS 64  
DS 1  
SWH 8223.685 Hz  
FIDRES 0.250967 Hz  
AQ 1.9922944 sec  
RG 148.91  
DW 60.800 usec  
DE 6.50 usec  
TE 298.9 K  
D1 1.00000000 sec  
TD0 1

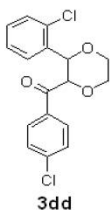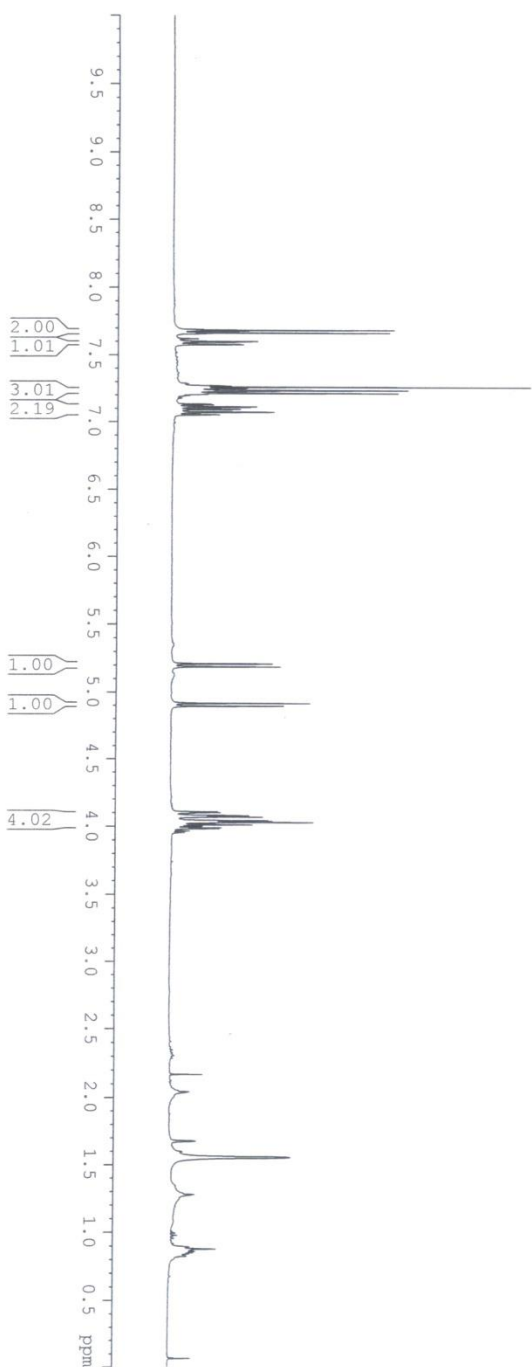

===== CHANNEL f1 =====  
SFO1 400.1524711 MHz  
NUC1 1H  
P1 14.75 usec  
PLW1 12.00000000 W  
F2 - Processing parameters  
SI 16384  
SF 400.1500097 MHz  
WDW EM  
SSB 0  
LB 0.30 Hz  
GB 0  
PC 1.00

<sup>13</sup>C of VBAR-263/12

— 193.94

139.77  
134.99  
133.95  
133.28  
130.32  
129.82  
129.64  
128.88  
128.46  
127.19

82.71  
77.46  
77.15  
76.83  
76.32  
66.93  
66.74

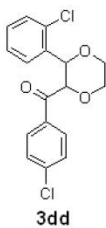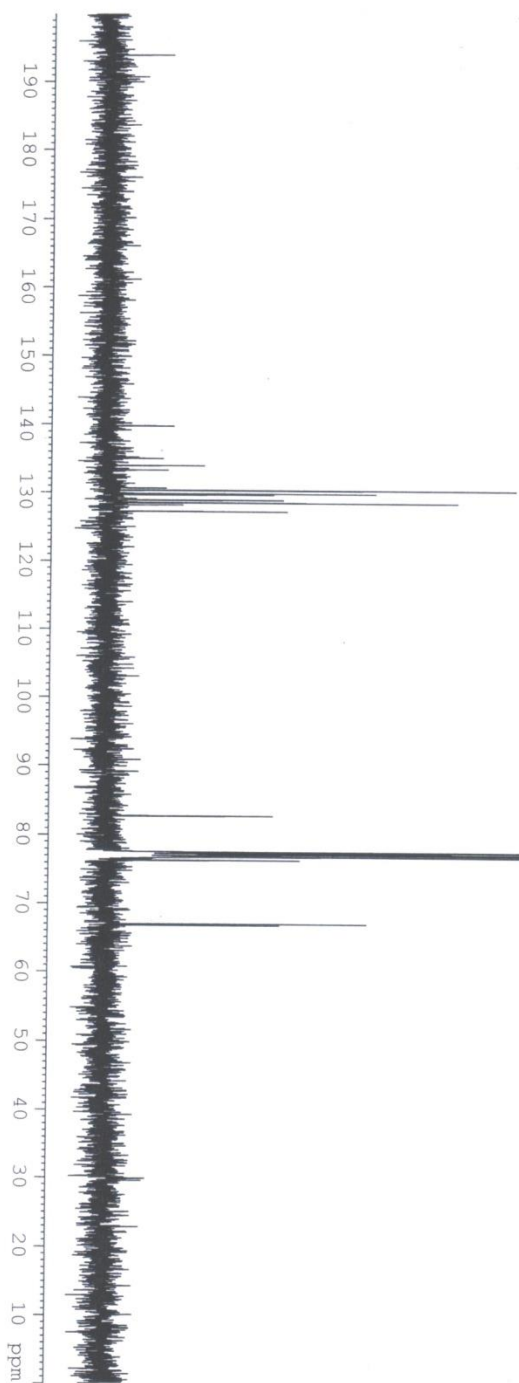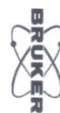

Current Data Parameters  
NAME Dr. A MAJE 2018  
EXPNO 230  
PROCNO 1

F2 - Acquisition Parameters  
Date\_ 20180401  
Time 13.31  
INSTRUM spect  
PROBHD 5 mm PABO BB/  
PULPROG zgpg30  
TD 32768  
SOLVENT CDCl3  
NS 1024  
DS 2  
SWH 24038.461 Hz  
FIDRES 0.733596 Hz  
AQ 0.6815744 sec  
RG 186.42  
DW 20.800 usec  
DE 6.50 usec  
TE 298.6 K  
D1 2.00000000 sec  
D11 0.03000000 sec  
TD0 1

CHANNEL f1  
SFO1 100.6278588 MHz  
NUC1 13C  
P1 8.90 usec  
PLM1 54.00000000 W

CHANNEL f2  
SFO2 400.1516006 MHz  
NUC2 1H  
CPDPRG12 waltz16  
PCPD2 90.00 usec  
PLM2 12.00000000 W  
PLM12 0.32231000 W  
PLM13 0.16212000 W

F2 - Processing parameters  
SI 16384  
SF 100.6177843 MHz  
WDW EM  
SSB 0  
LB 1.00 Hz  
GB 0  
PC 1.40

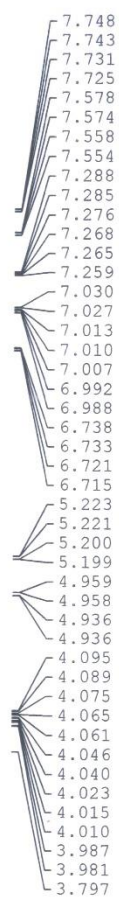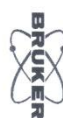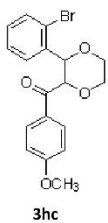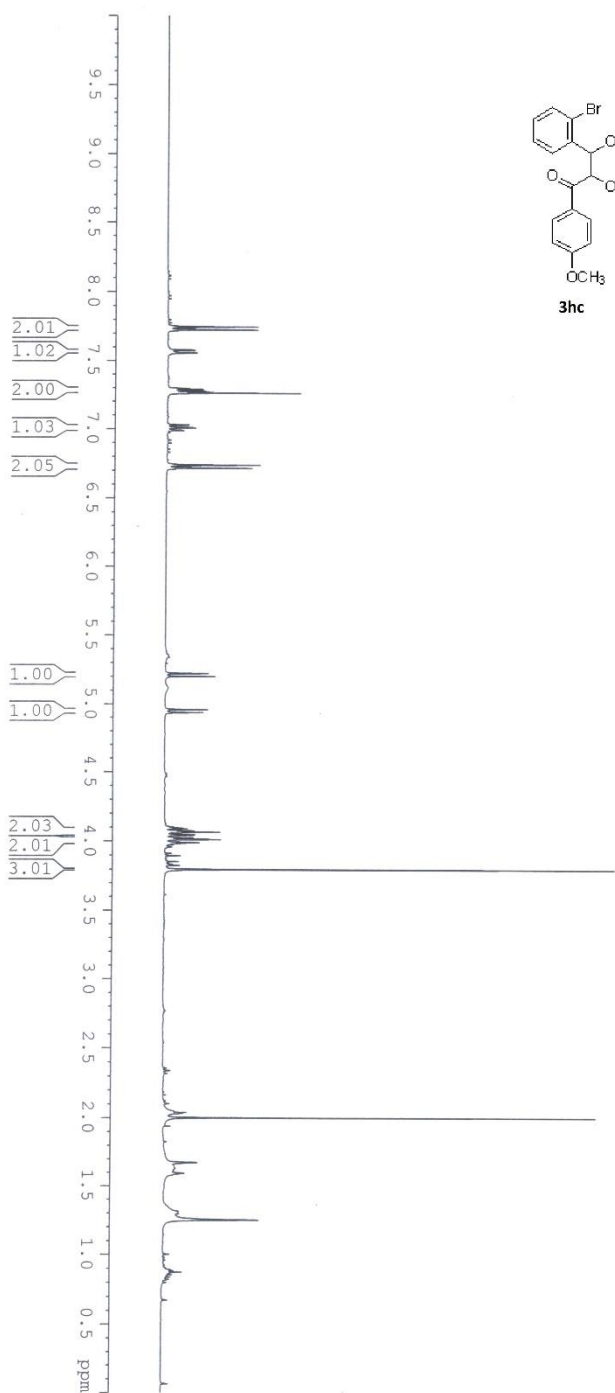

Current Data Parameters  
NAME Dr. A MAJEE 2018  
EXPNO 580  
PROCNO 1

F2 - Acquisition Parameters  
Date\_ 20180718  
Time\_ 16.46  
INSTRUM spect  
PROBHD 5 mm PABBO BB/  
PULPROG zg30  
TD 32768  
SOLVENT CDCl3  
NS 24  
DS 1  
SWH 8223.685 Hz  
FIDRES 0.250967 Hz  
AQ 1.9922944 sec  
RG 120.16  
DW 60.800 usec  
DE 6.50 usec  
TE 296.1 K  
D1 1.00000000 sec  
TD0 1

===== CHANNEL f1 =====  
SFO1 400.1524711 MHz  
NUC1 1H  
P1 14.75 usec  
PLW1 12.00000000 W

F2 - Processing parameters  
SI 16384  
SF 400.1500097 MHz  
WDW EM  
SSB 0  
LB 0.30 Hz  
GB 0  
PC 1.00

13C of VBAR 263/32

193.26  
163.63  
136.89  
133.00  
131.37  
129.92  
129.21  
128.73  
127.63  
123.80  
113.39  
82.14  
78.55  
77.47  
77.15  
76.83  
66.89  
66.73  
55.54

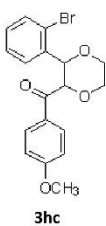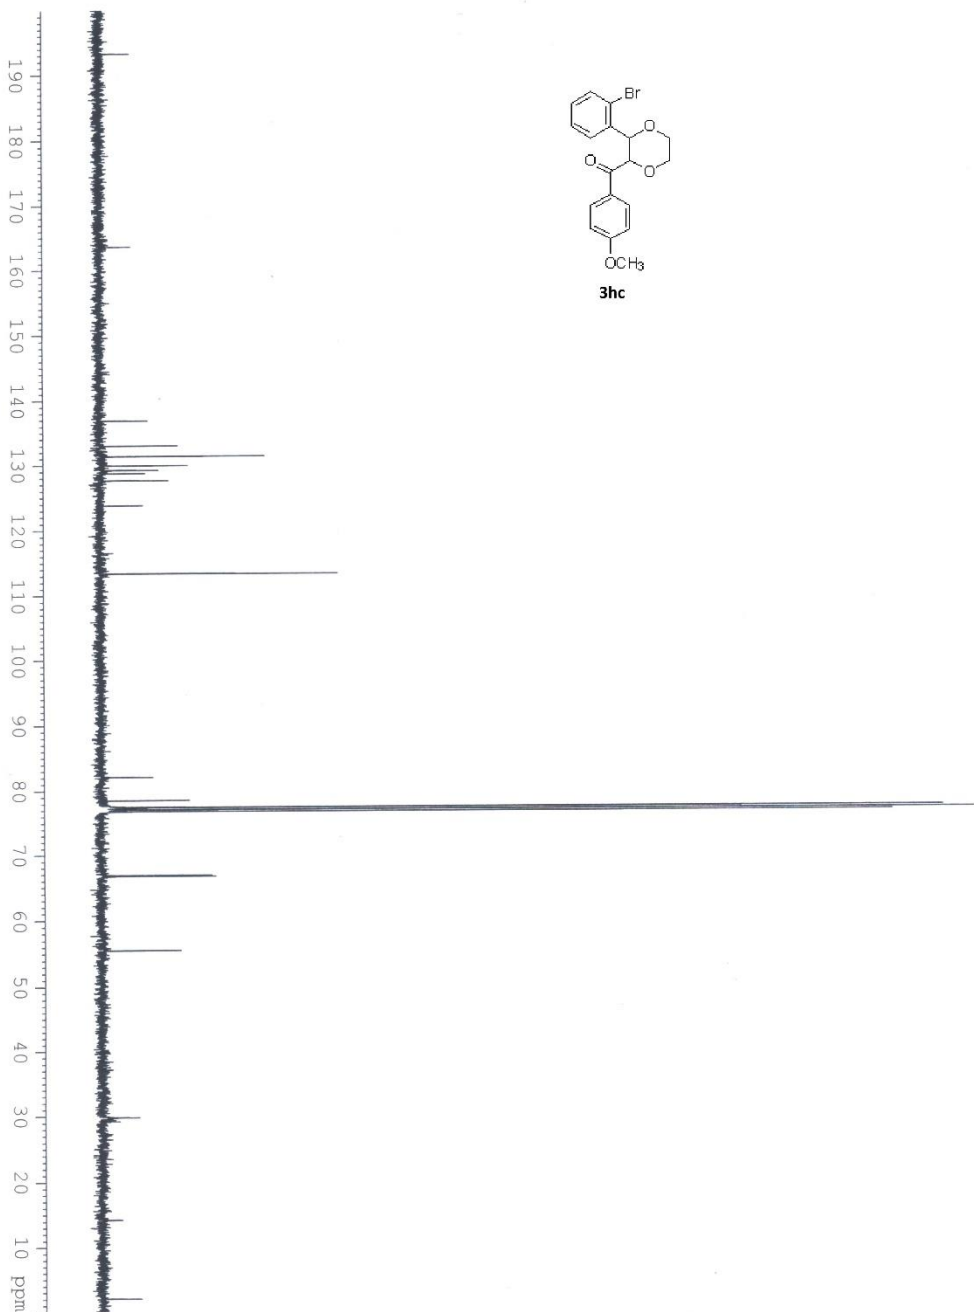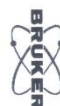

Current Data Parameters  
NAME Dr. A. MAJE 2018  
EXPNO 581  
PROCNO 1

F2 - Acquisition Parameters  
Date\_ 20180718  
Time\_ 17.08  
INSTRUM spect  
PROBHD 5 mm PABBO BB/  
PULPROG zgpg30  
TD 32768  
SOLVENT CDCl3  
NS 400  
DS 2  
SWH 24038.461 Hz  
FIDRES 0.733596 Hz  
AQ 0.681574 sec  
RG 120.16  
DW 20.800 usec  
DE 6.50 usec  
TE 297.1 K  
D1 2.0000000 sec  
D11 0.0300000 sec  
TD0 1

===== CHANNEL f1 =====  
SFO1 100.627858 MHz  
NUC1 13C  
P1 8.90 usec  
PLW1 54.0000000 W

===== CHANNEL f2 =====  
SFO2 400.1516006 MHz  
NUC2 1H  
CPDPRG12 waltz16  
PCPD2 90.00 usec  
PLW2 12.0000000 W  
PLW12 0.3223100 W  
PLW13 0.1621200 W

F2 - Processing parameters  
SI 16384  
SF 100.6177858 MHz  
WDW EM  
SSB 0  
LB 1.00 Hz  
GB 0  
PC 2.00

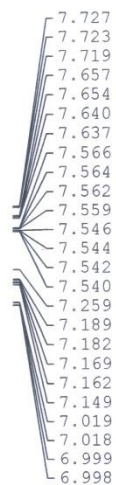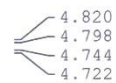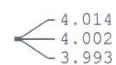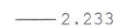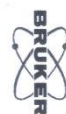

Current Data Parameters  
NAME Dr. A MAJEE 2018  
EXPNO 545  
PROCNO 1

F2 - Acquisition Parameters  
Date\_ 20180706  
Time 11.50  
INSTRUM spect  
PROBHD 5 mm PABBO BB/  
PULPROG zg30  
TD 32768  
SOLVENT CDCl3  
NS 24  
DS 1  
SWH 8223.685 Hz  
FIDRES 0.250967 Hz  
AQ 1.9922944 sec  
RG 87.66  
DW 60.800 usec  
DE 6.50 usec  
TE 299.4 K  
D1 1.00000000 sec  
TD0 1

===== CHANNEL f1 =====  
SFO1 400.1524711 MHz  
NUC1 1H  
P1 14.75 usec  
PLW1 12.00000000 W

F2 - Processing parameters  
SI 16384  
SF 400.150097 MHz  
WDW EM  
SSB 0  
LB 0.30 Hz  
GB 0  
PC 1.00

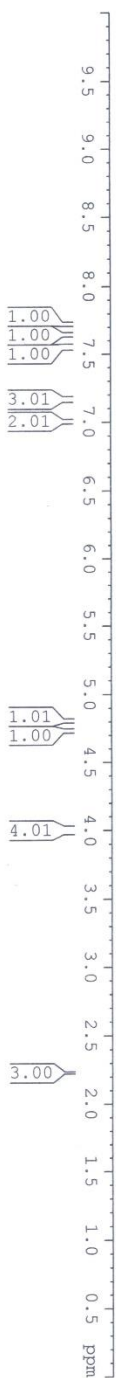

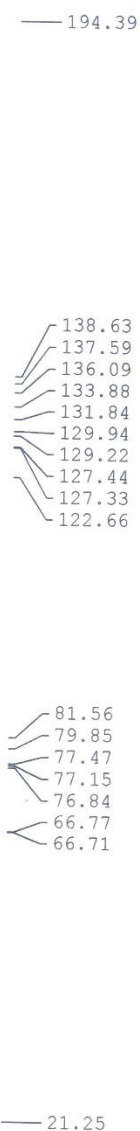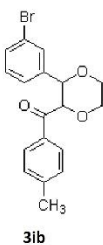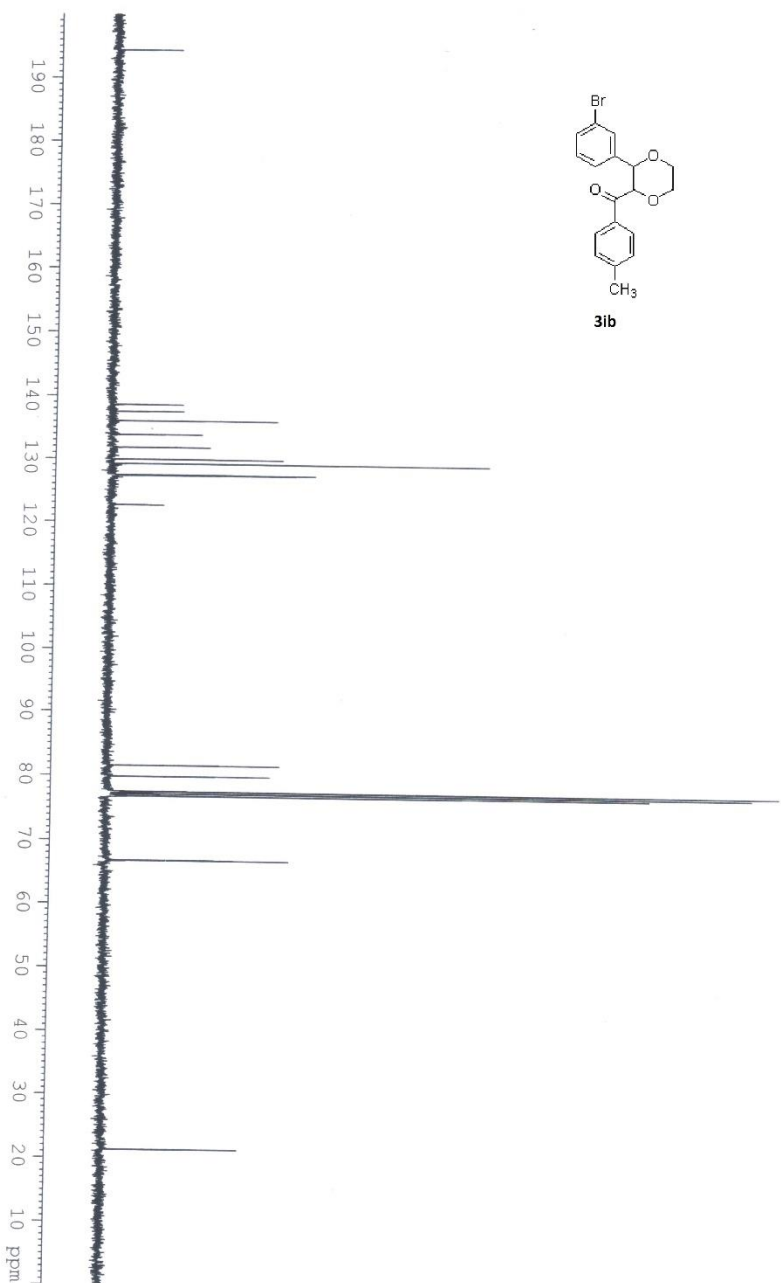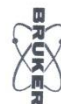

Current Data Parameters  
NAME Dr. A MAJE 2018  
EXPNO 546  
PROCNO 1

F2 - Acquisition Parameters  
Date\_ 20180706  
Time 12.13  
INSTRUM spect  
PROBHD 5 mm PABBO BB/  
PULPROG zgpg30  
TD 32768  
SOLVENT CDCl3  
NS 400  
DS 2  
SWH 24038.461 Hz  
FIDRES 0.733596 Hz  
AQ 0.6815744 sec  
RG 87.66  
DW 20.800 usec  
DE 6.50 usec  
TE 300.1 K  
D1 2.00000000 sec  
D11 0.03000000 sec  
TD0 1

CHANNEL f1  
SFO1 100.627858 MHz  
NUC1 13C  
P1 8.90 usec  
PLW1 54.00000000 W

CHANNEL f2  
SFO2 400.151606 MHz  
NUC2 1H  
CPDPRG12 waltz16  
PCPD2 90.00 usec  
PLW2 12.00000000 W  
PLW12 0.32231000 W  
PLW13 0.16212000 W

F2 - Processing parameters  
SI 16384  
SF 100.6177844 MHz  
WDW EM  
SSB 0  
LB 1.00 Hz  
GB 0  
PC 2.00

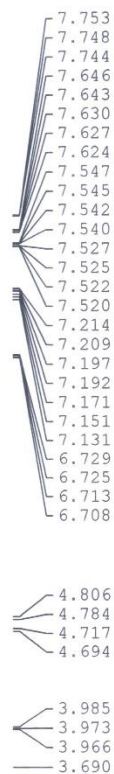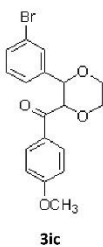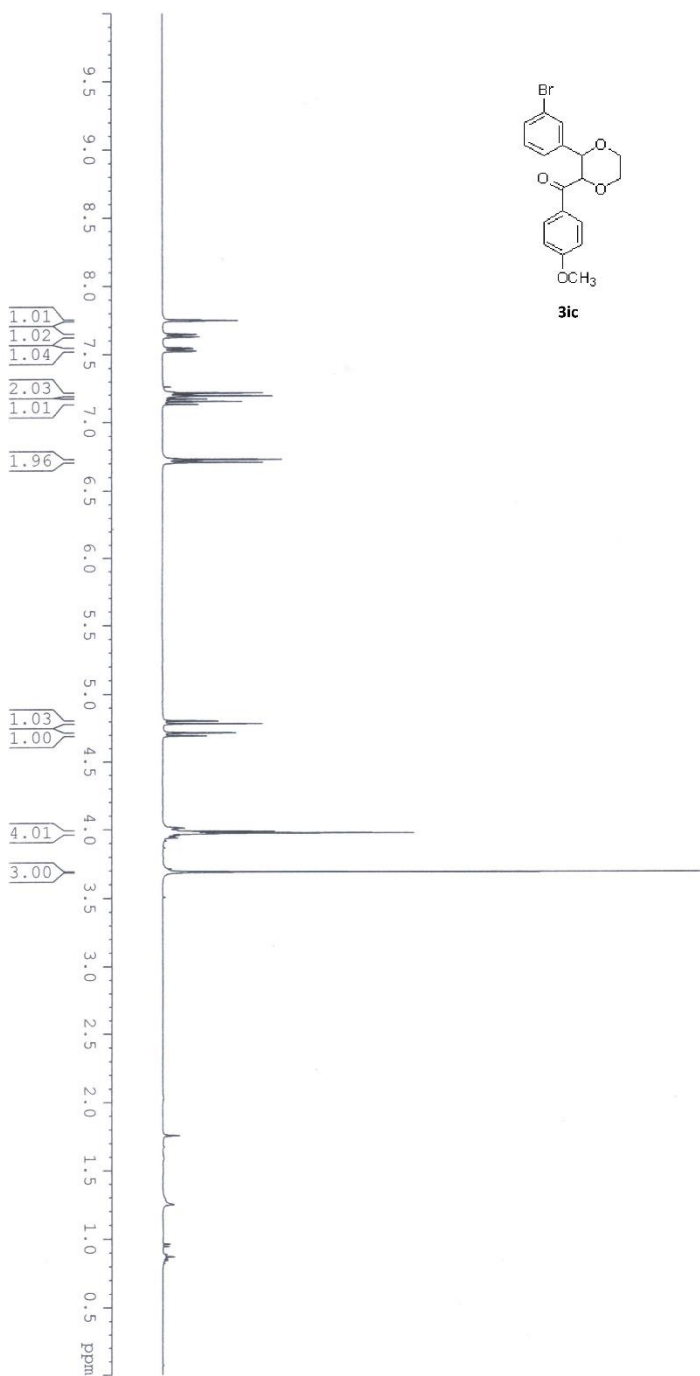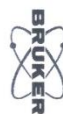

Current Data Parameters  
NAME Dr. A. MAJEE 2018  
EXPNO 548  
PROCNO 1

F2 - Acquisition Parameters  
Date\_ 20180707  
Time 10.05  
INSTRUM spect  
PROBHD 5 mm PABBO BB/  
PULPROG zg30  
TD 32768  
SOLVENT CDCl3  
NS 16  
DS 1  
SWH 8223.685 Hz  
FIDRES 0.250967 Hz  
AQ 1.9922944 sec  
RG 30.11  
DW 60.800 usec  
DE 6.50 usec  
TE 299.3 K  
D1 1.00000000 sec  
TD0 1

===== CHANNEL f1 =====  
SFO1 400.1524711 MHz  
NUC1 1H  
P1 14.75 usec  
PLW1 12.00000000 W  
F2 - Processing parameters  
SI 16384  
SF 400.1500094 MHz  
WDW EM  
SSB 0  
LB 0.30 Hz  
GB 0  
PC 1.50

13C OF VBAR-263/30

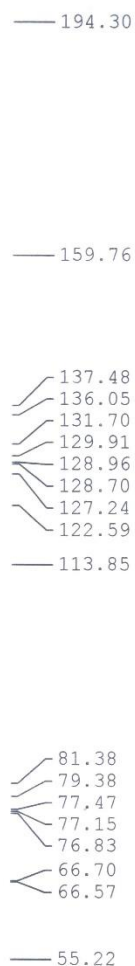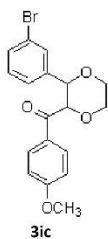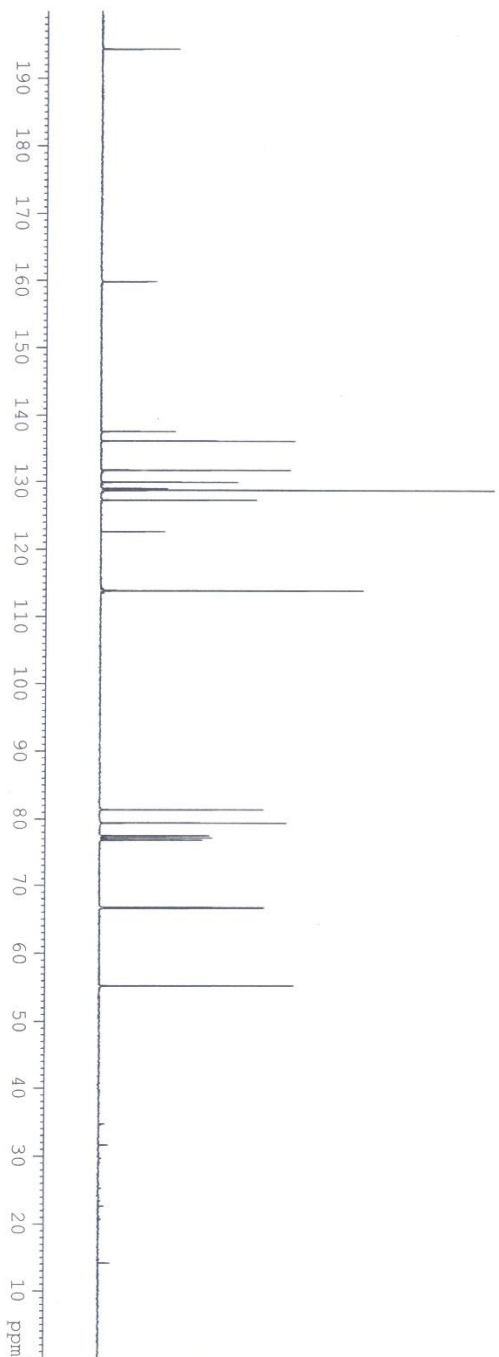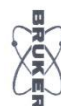

Current Data Parameters  
NAME Dr. A MAJE 2018  
EXPNO 549  
PROCNO 1

F2 - Acquisition Parameters  
Date\_ 20180707  
Time 10.24  
INSTRUM spect  
PROBHD 5 mm PABBO BB/  
PULPROG zgpg30  
TD 32768  
SOLVENT CDCl3  
NS 320  
DS 2  
SWH 24038.461 Hz  
FIDRES 0.733596 Hz  
AQ 0.6815744 sec  
RG 77.59  
RG 20.800 usec  
DE 6.50 usec  
TE 300.1 K  
D1 2.00000000 sec  
D11 0.03000000 sec  
TD0 1

CHANNEL f1  
SFO1 100.627858 MHz  
NUC1 13C  
P1 8.90 usec  
PLW1 54.00000000 W

CHANNEL f2  
SFO2 400.151606 MHz  
NUC2 1H  
CDEPRG12 waltz16  
PCPD2 90.00 usec  
PLW2 12.00000000 W  
PLW12 0.32231000 W  
PLW13 0.16212000 W

F2 - Processing parameters  
SI 16384  
SF 100.6177961 MHz  
WDW EM  
SSB 0  
LB 1.00 Hz  
GB 0  
PC 2.00



# 1H of VBAR-263/10

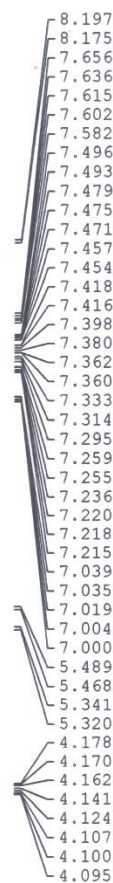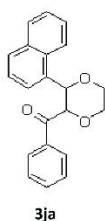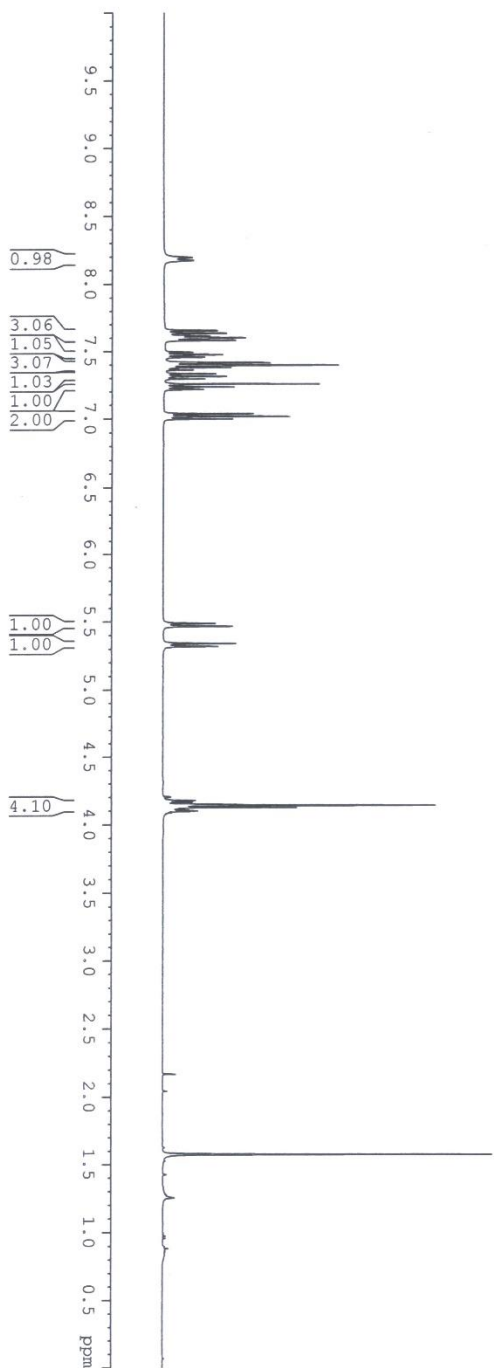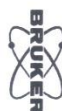

Current Data Parameters  
 NAME Dr. A. MAYEE 2018  
 EXPNO 156  
 PROCNO 1

F2 - Acquisition Parameters  
 Date\_ 20180226

Time 16.47  
 INSTRUM spect  
 PROBD 5 mm PABBO BB/  
 PULPROG zg30  
 TD 32768  
 SOLVENT CDCl3  
 NS 30  
 DS 1  
 SWH 8223.685 Hz  
 FIDRES 0.250967 Hz  
 AQ 1.9922944 sec  
 RG 168 31  
 DM 60.800 usec  
 DE 6.50 usec  
 TE 295.8 K  
 D1 1.00000000 sec  
 TD0 1

===== CHANNEL f1 =====  
 SFO1 400.1524711 MHz  
 NUCL1 1H  
 P1 14.75 usec  
 PLW1 12.00000000 W

F2 - Processing parameters  
 SI 16384  
 SF 400.150097 MHz  
 WDW EM  
 SSB 0  
 LB 0.30 Hz  
 GB 0  
 PC 1.00

<sup>13</sup>C of VBAR-263/10

195.97

135.61  
133.74  
133.07  
130.96  
129.29  
128.69  
128.20  
127.84  
126.37  
125.92  
125.65  
125.06  
123.74

81.12  
77.46  
77.15  
76.83  
67.18  
66.82

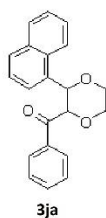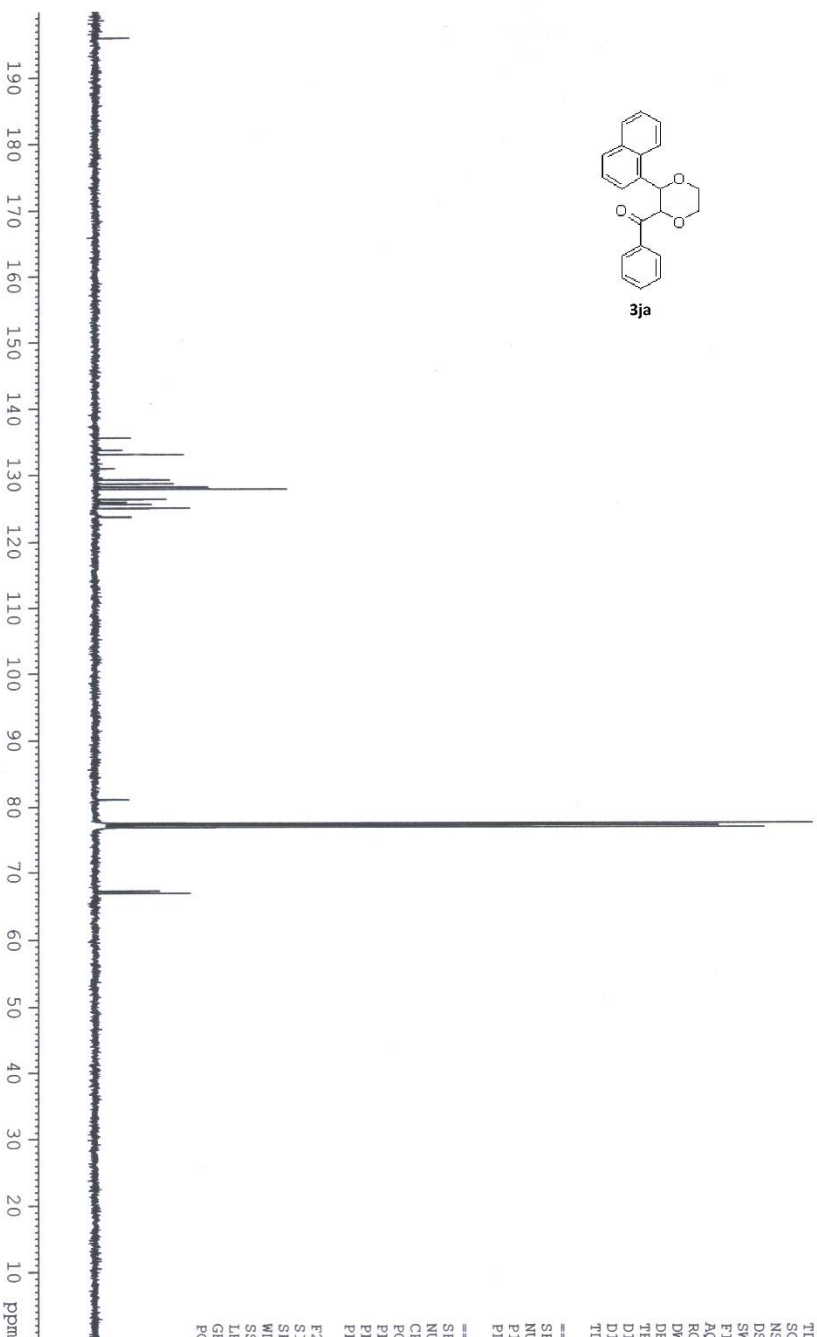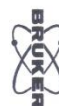

Current Data Parameters  
NAME Dr. A. MAJEE 2018  
EXPNO 159  
PROCNO 1

F2 - Acquisition Parameters  
Date\_ 20180226  
Time 17.37  
INSTRUM spect  
PROBHD 5 mm PABBO BB/  
PULPROG zgpg30  
TD 32768  
SOLVENT CDCl3  
NS 640  
DS 2  
SWH 24038.461 Hz  
FIDRES 0.733596 Hz  
AQ 0.6815744 sec  
RG 186.42  
DW 20.800 usec  
DE 6.50 usec  
TE 296.7 K  
D1 2.00000000 sec  
D11 0.03000000 sec  
TD0 1

CHANNEL f1  
SF01 100.627858 MHz  
NUC1 <sup>13</sup>C  
P1 8.90 usec  
PLW1 54.00000000 W

CHANNEL f2  
SF02 400.151606 MHz  
NUC2 <sup>1</sup>H  
CPDPRG12 waltz16  
PCPD2 90.00 usec  
PLW2 12.00000000 W  
PLW12 0.32231000 W  
PLW13 0.16212000 W

F2 - Processing parameters  
SI 16384  
SF 100.6177854 MHz  
WDW EM  
SSB 0  
LB 1.00 Hz  
GB 0  
PC 1.40
